# Supplementary material for: Kongcun Town Asymptomatic Intracranial Artery Stenosis study in Shandong, China: cohort profile
Source: PubMed Central journal article supplement — BMJ Open. 2020 Jul 13;10(7):e036454. doi: 10.1136/bmjopen-2019-036454 (PMC7359188; doi:10.1136/bmjopen-2019-036454), 2020-07-13
Supplement: bmjopen-2019-036454.draft_revisions.pdf [file bmjopen-2019-036454.draft_revisions.pdf]

# BMJ Open

BMJ Open is committed to open peer review. As part of this commitment we make the peer review history of every article we publish publicly available.

When an article is published we post the peer reviewers' comments and the authors' responses online. We also post the versions of the paper that were used during peer review. These are the versions that the peer review comments apply to.

The versions of the paper that follow are the versions that were submitted during the peer review process. They are not the versions of record or the final published versions. They should not be cited or distributed as the published version of this manuscript.

BMJ Open is an open access journal and the full, final, typeset and author-corrected version of record of the manuscript is available on our site with no access controls, subscription charges or pay-per-view fees (<http://bmjopen.bmj.com>).

If you have any questions on BMJ Open's open peer review process please email [info.bmjopen@bmj.com](mailto:info.bmjopen@bmj.com)

# BMJ Open

## Cohort profile: the Kongcun Town Asymptomatic Intracranial Artery Stenosis Study in China

|                               |                                                                                                                                                                                                                                                                                                                                                                                                                                                                                                                                                                                                                                                                                                                                                                                                                                                                                                                                                                                                                                                                                                                                                                                                                                                                                                                                                         |
|-------------------------------|---------------------------------------------------------------------------------------------------------------------------------------------------------------------------------------------------------------------------------------------------------------------------------------------------------------------------------------------------------------------------------------------------------------------------------------------------------------------------------------------------------------------------------------------------------------------------------------------------------------------------------------------------------------------------------------------------------------------------------------------------------------------------------------------------------------------------------------------------------------------------------------------------------------------------------------------------------------------------------------------------------------------------------------------------------------------------------------------------------------------------------------------------------------------------------------------------------------------------------------------------------------------------------------------------------------------------------------------------------|
| Journal:                      | <i>BMJ Open</i>                                                                                                                                                                                                                                                                                                                                                                                                                                                                                                                                                                                                                                                                                                                                                                                                                                                                                                                                                                                                                                                                                                                                                                                                                                                                                                                                         |
| Manuscript ID                 | bmjopen-2019-036454                                                                                                                                                                                                                                                                                                                                                                                                                                                                                                                                                                                                                                                                                                                                                                                                                                                                                                                                                                                                                                                                                                                                                                                                                                                                                                                                     |
| Article Type:                 | Cohort profile                                                                                                                                                                                                                                                                                                                                                                                                                                                                                                                                                                                                                                                                                                                                                                                                                                                                                                                                                                                                                                                                                                                                                                                                                                                                                                                                          |
| Date Submitted by the Author: | 16-Dec-2019                                                                                                                                                                                                                                                                                                                                                                                                                                                                                                                                                                                                                                                                                                                                                                                                                                                                                                                                                                                                                                                                                                                                                                                                                                                                                                                                             |
| Complete List of Authors:     | <p>Wang, Xiang ; Shandong Provincial Hospital, Department of Neurology<br/>         Zhao, Yuanyuan; Shandong Provincial Hospital, Department of Neurology<br/>         Ji, Xiaokang; Shandong University School of Public Health, Department of biostatistics<br/>         Sang, Shaowei; Shandong University Qilu Hospital, Department of clinical epidemiology<br/>         Shao, Sai; Shandong Medical Imaging Research Institute, Department of Radiology<br/>         Yan, Peng; Shandong Provincial Hospital, Department of Neurology<br/>         Li, Shan; Shandong Provincial Hospital, Department of Neurology<br/>         Li, JiFeng; Shandong Provincial Hospital, Department of Neurology<br/>         Wang, Guangbin; Shandong Medical Imaging Research Institute, Department of Radiology<br/>         Lu, Ming; Shandong University, Department of clinical epidemiology<br/>         Du, YiFeng; Shandong Provincial Hospital, Department of Neurology<br/>         Xue, Fuzhong; Shandong University School of Public Health, Department of biostatistics<br/>         Qiu, Chengxuan; Shandong Provincial Hospital, Department of Neurology; Karolinska Institutet-Stockholm University, Department of Neurobiology, Care Sciences and Society<br/>         Sun, QinJian; Shandong Provincial Hospital, Department of Neurology</p> |
| Keywords:                     | EPIDEMIOLOGY, Neurology < INTERNAL MEDICINE, Magnetic resonance imaging < RADIOLOGY & IMAGING, STROKE MEDICINE, VASCULAR MEDICINE                                                                                                                                                                                                                                                                                                                                                                                                                                                                                                                                                                                                                                                                                                                                                                                                                                                                                                                                                                                                                                                                                                                                                                                                                       |
|                               |                                                                                                                                                                                                                                                                                                                                                                                                                                                                                                                                                                                                                                                                                                                                                                                                                                                                                                                                                                                                                                                                                                                                                                                                                                                                                                                                                         |

SCHOLARONE™  
Manuscripts

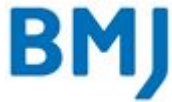

I, the Submitting Author has the right to grant and does grant on behalf of all authors of the Work (as defined in the below author licence), an exclusive licence and/or a non-exclusive licence for contributions from authors who are: i) UK Crown employees; ii) where BMJ has agreed a CC-BY licence shall apply, and/or iii) in accordance with the terms applicable for US Federal Government officers or employees acting as part of their official duties; on a worldwide, perpetual, irrevocable, royalty-free basis to BMJ Publishing Group Ltd ("BMJ") its licensees and where the relevant Journal is co-owned by BMJ to the co-owners of the Journal, to publish the Work in this journal and any other BMJ products and to exploit all rights, as set out in our [licence](#).

The Submitting Author accepts and understands that any supply made under these terms is made by BMJ to the Submitting Author unless you are acting as an employee on behalf of your employer or a postgraduate student of an affiliated institution which is paying any applicable article publishing charge ("APC") for Open Access articles. Where the Submitting Author wishes to make the Work available on an Open Access basis (and intends to pay the relevant APC), the terms of reuse of such Open Access shall be governed by a Creative Commons licence – details of these licences and which [Creative Commons](#) licence will apply to this Work are set out in our licence referred to above.

Other than as permitted in any relevant BMJ Author's Self Archiving Policies, I confirm this Work has not been accepted for publication elsewhere, is not being considered for publication elsewhere and does not duplicate material already published. I confirm all authors consent to publication of this Work and authorise the granting of this licence.

1  
2  
3  
4 **Cohort profile: the Kongcun Town Asymptomatic Intracranial Artery Stenosis Study in**  
5  
6 **China**  
7  
8  
9

10  
11  
12  
13  
14 Xiang Wang<sup>a</sup>, Yuanyuan Zhao<sup>a</sup>, Xiaokang Ji<sup>b</sup>, Shaowei Sang<sup>c</sup>, Sai Shao<sup>d</sup>, Peng Yan<sup>a</sup>, Shan  
15  
16 Li<sup>a</sup>, Jifeng Li<sup>a</sup>, Guangbin Wang<sup>d</sup>, Ming Lv<sup>c</sup>, Yifeng Du<sup>a</sup>, Fuzhong Xue<sup>b</sup>, Chengxuan Qiu<sup>a,e</sup>,  
17  
18 Qinjian Sun<sup>a,\*</sup>  
19  
20  
21  
22  
23  
24  
25  
26

27 <sup>a</sup>Department of Neurology, Shandong Provincial Hospital Affiliated to Shandong University,  
28  
29 Jinan, Shandong, China  
30  
31  
32

33 <sup>b</sup>Department of Biostatistics, School of Public Health, Shandong University, Jinan, Shandong,  
34  
35 China  
36  
37  
38

39 <sup>c</sup>Department of Clinical Epidemiology, Qilu Hospital affiliated to Shandong University, Jinan,  
40  
41 Shandong, China  
42  
43  
44

45 <sup>d</sup>Department of Radiology, Shandong Medical Imaging Research Institute Affiliated to  
46  
47 Shandong University, Jinan, Shandong, China  
48  
49  
50

51 <sup>e</sup>Aging Research Center, Department of Neurobiology, Care Sciences and Society, Karolinska  
52  
53 Institutet-Stockholm University, Stockholm, Sweden  
54  
55  
56  
57  
58  
59  
60

1  
2  
3  
4 **Running title:** The Kongcun Town Asymptomatic ICAS Study  
5  
6  
7

8 **Word count:** 3584  
9  
10  
11  
12  
13  
14

15 \*Corresponding author:  
16  
17

18  
19 Qinjian Sun, Department of Neurology, Shandong Provincial Hospital Affiliated to Shandong  
20  
21 University, # 324 Jingwu Weiqi Road, Jinan, Shandong 250021, P. R. China.  
22  
23

24 Email: sqj1210@163.com  
25  
26  
27  
28  
29  
30  
31  
32  
33  
34  
35  
36  
37  
38  
39  
40  
41  
42  
43  
44  
45  
46  
47  
48  
49  
50  
51  
52  
53  
54  
55  
56  
57  
58  
59  
60

## ABSTRACT

**Purpose:** The population-based Kongcun Town Asymptomatic Intracranial Artery Stenosis (KT-aICAS) study aims to investigate the prevalence and major cardiovascular risk factors (CRFs) or biomarkers related to the development and prognosis of aICAS.

**Participants:** The KT-aICAS study included 2311 rural residents who were aged  $\geq 40$  years and living in Kongcun Town, Shandong Province, China. Baseline examination was conducted from October 2017 to October 2018, during which information on demographics, socioeconomics, personal and family medical history, and lifestyle factors was collected through face-to-face interviews, physical examination, and blood tests. Asymptomatic ICAS was initially screened using transcranial Doppler examination and then diagnosed using magnetic resonance angiography. Atherosclerosis in carotid arteries was diagnosed via carotid ultrasonography. High-resolution magnetic resonance imaging was further used to evaluate the vessel wall of aICAS. Neuropsychological assessments were performed in the subjects diagnosed with aICAS.

**Findings to date:** Of the 2311 participants, 2027 completed the diagnostic procedure and aICAS was detected in 154 persons, resulting in an overall prevalence of 7.6%. The prevalence of aICAS increased with advancing age from 5.1% in participants aged 40-49 years to 12.7% in those aged  $\geq 70$  years ( $P < 0.001$ ). Asymptomatic ICAS was detected in 305 intracranial arteries, including 221 (72.5%) in the anterior circulation and 84 (27.5%) in the posterior circulation ( $P < 0.001$ ). In addition, major CRFs were highly prevalent among middle-aged and elderly rural dwellers who were free of stroke.

1  
2  
3  
4 **Future plans:** Follow-up examinations will be performed every 3 years. This study will  
5  
6 increase our knowledge about the natural history of aICAS and facilitate studies of aICAS-  
7  
8 associated disorders among rural-dwelling Chinese adults, such as ischaemic stroke and  
9  
10 vascular cognitive impairment.  
11  
12  
13  
14  
15  
16  
17  
18

### 19 **Strengths and limitations of this study**

- 20  
21  
22
- 23 ➤ This population-based study integrated TCD and MRA to detect aICAS among residents  
24 living in rural communities, which is a feasible approach to obtain a relatively accurate  
25 prevalence of aICAS in rural residents.  
26  
27
  - 28 ➤ High-resolution MRI scans were used to further identify characteristics of aICAS.  
29
  - 30 ➤ Neuropsychological evaluation in this study covers global cognitive function and  
31 multiple cognitive domains.  
32  
33
  - 34 ➤ This study used TCD as a screening tool for aICAS, which might have missed some  
35 cases and underestimated the prevalence of aICAS.  
36  
37
  - 38 ➤ The study sample was selected from only one rural area, and thus, cautiousness is needed  
39 when generalizing the study findings to other rural populations in China.  
40  
41  
42  
43  
44  
45  
46  
47  
48  
49  
50  
51  
52  
53  
54  
55  
56  
57  
58  
59  
60

## INTRODUCTION

Intracranial artery stenosis (ICAS) due to atherosclerosis is a leading cause of ischaemic stroke worldwide, especially in Asian populations[1]. In addition, intracranial atherosclerosis has been associated with cognitive impairment [2]. Atherosclerotic lesions may develop and progress silently over years, subsequently impair cognitive function, or even suddenly cause clinical stroke. Therefore, the detection of ICAS in the asymptomatic phase may facilitate early preventive and therapeutic interventions and thus delay the progression to symptomatic stroke and cognitive impairment[3, 4]. Several population-based studies that used non-invasive tools, such as transcranial ultrasound or magnetic resonance angiography (MRA), to investigate the prevalence of asymptomatic ICAS (aICAS) suggested that the prevalence of aICAS was around 9% in Caucasian populations[5, 6] and 12% in African-Americans [6], but as high as 24.5% in Asian populations[7-10]. However, data remain limited with regard to the prevalence of aICAS among rural residents in China, where cardiovascular risk factors (CRFs) are highly prevalent and poorly controlled[11].

Furthermore, the natural history and prognosis of aICAS remains poorly understood. The Warfarin versus Aspirin Symptomatic Intracranial Disease trial showed that the risk of stroke from aICAS was relatively low among patients with co-existing symptomatic ICAS and aICAS[12]. In addition, asymptomatic atherosclerotic stenosis of the middle cerebral artery (MCA) is apparently not a malignant disease[13, 14]. These studies suggest that aICAS may have a benign long-term prognosis. It is worth noting that these previous studies have either focused on selective patient groups (co-existence of asymptomatic and symptomatic stenosis) or targeted special vessels (e.g., MCA), and the general population-based studies



1  
2  
3  
4 that aimed at investigating the prognosis of aICAS remain scarce. Indeed, a population-based  
5  
6 prospective study of 2807 healthy volunteers (mean age, 62.0 years) in Japan found that  
7  
8 aICAS was a risk factor for clinical stroke[15]. However, the predictors for the conversion  
9  
10 and progression of aICAS to the symptomatic stage remain largely unclear.  
11  
12  
13

14       Symptomatic ICAS is an independent risk factor for cognitive decline. However,  
15  
16 whether aICAS is associated with subsequent cognitive decline remains to be explored.  
17  
18 Recently, a prospective cohort study found that asymptomatic severe MCA stenosis (MCAS)  
19  
20 with poor collateral circulation was associated with declines in multiple cognitive domains  
21  
22 characterized by vascular cognitive impairment[16]. The association between cognitive  
23  
24 function and aICAS in other intracranial arteries remains to be clarified.  
25  
26  
27  
28  
29

30       Therefore, we initiate the Kongcun Town aICAS (KT-aICAS) study that aims: (1) to  
31  
32 investigate occurrence (e.g., prevalence and incidence) and distribution of aICAS among  
33  
34 middle-aged and older adults living in rural communities; (2) to explore CRFs of aICAS and  
35  
36 clinical biomarkers that may predict the progression from aICAS to ischaemic stroke; (3) to  
37  
38 assess the association between aICAS and cognitive impairment; and (4) to build a  
39  
40 comprehensive database that facilitates longer-term multidisciplinary research regarding the  
41  
42 biomedical, clinical, neuroimaging, and epidemiological aspects of aICAS.  
43  
44  
45  
46  
47  
48  
49  
50

## 51 **Cohort description**

### 52 ***Study Design***

53  
54  
55 At baseline, a population-based cross-sectional study was conducted to detect the prevalence  
56  
57 and distribution of aICAS. A subsequent prospective cohort study will be performed to  
58  
59  
60

1  
2  
3  
4 determine the incidence rates of aICAS, examine the association between aICAS and  
5  
6 ischaemic stroke or cognitive impairment, and explore a variety of CRFs, clinical features,  
7  
8 imaging markers or biomarkers for the conversion from aICAS to symptomatic ICAS and the  
9  
10 potential cognitive consequences.  
11  
12

### 13 ***Study Communities and Population***

14  
15  
16 The KT-aICAS Study targeted all registered residents who were aged  $\geq 40$  years, free of a  
17  
18 history of stroke, and living in the Kongcun Town of Pingyin county in Shandong Province in  
19  
20 October 2017. Kongcun Town is a rural township that is located ~76 km west of Jinan, the  
21  
22 capital of Shandong Province, China. Kongcun Town includes ~30000 residents in an area of  
23  
24 ~5000 hectares. The majority of people in the town are farmers. Since the 2000s, the School  
25  
26 of Public Health at Shandong University has been working closely with the town government  
27  
28 and local health professionals to promote the health of local residents. This has involved  
29  
30 regular collection of data on demographics, lifestyle factors, health history, and diet.  
31  
32  
33 Following the baseline assessment in 2017-2018, all participants will be invited to undertake  
34  
35 a follow-up assessment every 3 years with the aim of detecting patients with aICAS and  
36  
37 identifying incident clinical stroke and cognitive impairment. [Figure 1](#) shows the basic design  
38  
39 of the KT-aICAS Study and the flowchart of the study population and assessments.  
40  
41  
42  
43  
44  
45  
46  
47

### 48 ***Ethics Approval and Consent to Participate***

49  
50 The protocol of the KT-aICAS Study was reviewed and approved by the ethical standards  
51  
52 committees on human experimentation at Shandong Provincial Hospital Affiliated to  
53  
54 Shandong University. Written informed consent was obtained from all of the participants.  
55  
56  
57 The study was conducted in accordance with the principles for medical research involving  
58  
59  
60

1  
2  
3  
4 human subjects expressed in the Declaration of Helsinki. The face-to-face interviews were  
5  
6 scheduled at the most convenient times for the participants. Respondents were free to refuse  
7  
8 participation or withdraw from the study at any time. Any case of serious illness that had not  
9  
10 been detected previously was urgently referred to the hospital.  
11  
12

### 13 ***Baseline Assessments***

14  
15  
16  
17 Baseline assessments were performed in October 2017-October 2018, which included a two-  
18  
19 phase design as briefly described below.  
20  
21

#### 22 *Phase 1*

23  
24 From October to November 2017, we performed a phase 1 assessment, a screening phase that  
25  
26 aimed to collect baseline data and identify people at high risk of aICAS. During this phase,  
27  
28 all participants underwent structured questionnaire survey, transcranial Doppler (TCD)  
29  
30 examination, and colour Doppler ultrasound examination (neck).  
31  
32  
33

34  
35 *Face-to-face interviews.* A standardized questionnaire was used to collect data on  
36  
37 demographic features, health and family history (e.g., chronic diseases), CRFs (e.g.,  
38  
39 hypertension, diabetes, and obesity), lifestyle factors (e.g., diet habits, smoking, alcohol  
40  
41 consumption, tea consumption, and physical activity), menstrual and reproductive history,  
42  
43 quality of life, and current use of medication. Typically, the interview took approximately 30  
44  
45 minutes. Then, all participants underwent physical and clinical examinations, which included  
46  
47 BP and anthropometric measurements, carotid artery B-mode ultrasonography, and TCD  
48  
49 examination.  
50  
51  
52  
53

54  
55 *BP and anthropometric measurements.* All measurements were performed by trained nurses.

56  
57 After a 5-min rest, arterial blood pressure was measured twice at a 5-min interval using an  
58  
59  
60

1  
2  
3  
4 automated sphygmomanometer with the subject in the seated position. The mean value of the  
5  
6 two measurements was used in the analysis. Hypertension was defined as blood pressure  
7  
8  $\geq 140/90$  mmHg or use of antihypertensive drugs. Height was measured without shoes using a  
9  
10 standard right-angle device and a fixed measurement tape (to the nearest 0.5 cm). Body  
11  
12 weight without heavy clothing was measured. Body mass index (BMI) was calculated as  
13  
14 height (meters) divided by weight (kilograms) squared. We defined obesity as a BMI  $\geq 28$   
15  
16 kg/m<sup>2</sup> and overweight as a BMI of 24-27.9 kg/m<sup>2</sup>.

17  
18  
19  
20  
21  
22 *TCD ultrasound examination.* Participants were examined with a portable machine (VIASYS  
23  
24 Companion III, Nicolet, Washington, United States) by two experienced physicians with  
25  
26 expertise in sonography after a 5-min rest in a quiet and comfortable room. The bilateral  
27  
28 MCA, anterior cerebral artery (ACA), posterior cerebral artery (PCA), vertebral artery (VA),  
29  
30 and basilar artery (BA) were examined with a 2 MHz probe through a temporal window,  
31  
32 occipital window, and eye window, respectively. The depth, peak systolic velocity (PSV),  
33  
34 mean flow velocity (MFV), end diastolic velocity, and pulsatility index were measured for  
35  
36 each artery. The following MFV cut-offs were used for the diagnosis of  $\geq 50\%$  intracranial  
37  
38 stenosis of various arteries according to the criteria described in the Stroke Outcomes and  
39  
40 Neuroimaging of Intracranial Atherosclerosis (SONIA) trial[17]: MFV  $\geq 100$  cm/s for MCA  
41  
42 stenosis, MFV  $\geq 80$  cm/s for VA stenosis, and MFV  $\geq 80$  cm/s for BA stenosis. Because the  
43  
44 ACA and PCA were not evaluated in the SONIA trial, we followed previously validated  
45  
46 criteria to define  $\geq 50\%$  stenosis in these vessels[18]: MFV  $\geq 80$  cm/s and  $\geq 30\%$  different  
47  
48 when compared to the contralateral ACA segment for ACA stenosis and MFV  $\geq 80$  cm/s for  
49  
50 PCA stenosis. The criteria for  $\geq 70\%$  stenosis were as follows[19]: MCA: MFV  $\geq 120$  cm/s or  
51  
52  
53  
54  
55  
56  
57  
58  
59  
60

1  
2  
3  
4 a stenotic/prestenotic ratio  $\geq 3$  or low velocity; VA and BA: MFV  $\geq 110$  cm/s or a  
5  
6 stenotic/prestenotic ratio  $\geq 3$ . In addition, the presence of turbulence or musical sounds and an  
7  
8 abnormal segmental velocity were considered for the diagnosis of stenosis.  
9

10  
11 *Carotid ultrasonography examination.* Carotid ultrasound examination was performed in the  
12  
13 head-straight flat supine position by two experienced physicians to measure intimal medial  
14  
15 thickness (IMT), PSV, and EDV of the common carotid artery (CCA), internal carotid artery  
16  
17 (ICA), and external carotid artery (ECA) with a 7-MHz linear transducer (Siemens ACUSON  
18  
19 P500). First, the structure of the vascular wall of the full-length of the CCA and the  
20  
21 bifurcation and the initial segment of the ICA as well as atherosclerotic plaques and  
22  
23 intravascular echo were measured in a cross-section. Then, the IMT of the distal segment of  
24  
25 the CCA (1 to 1.5 cm below the bifurcation level), the internal diameter of the ICA, and the  
26  
27 distal segment of the CCA were measured in longitudinal sections. The diameter was defined  
28  
29 as the vertical distance between the upper edge of the posterior wall of the vessel and the  
30  
31 inferior border of the anterior wall. When vessel stenosis occurred, the residual diameter and  
32  
33 original diameter were measured. The thickness of the IMT was defined as the vertical  
34  
35 distance between the upper edge of the posterior wall of the vessel and the upper edge of the  
36  
37 outer membrane. Location, morphology, and integrity of the fibrous cap and the acoustic  
38  
39 characteristics of the plaque were observed, and the size of the plaque was measured. Intimal  
40  
41 thickening was defined as intimal-middle film thickness  $\geq 1.0$  mm, and plaque was defined as  
42  
43 focal intimal-middle film thickness  $\geq 1.5$  mm[20].  
44  
45  
46  
47  
48  
49  
50  
51  
52  
53  
54

55  
56 *Laboratory tests.* After overnight fasting, peripheral venous blood samples were taken in the  
57  
58 morning. The blood was then allowed to clot in a 37 °C water bath for 30 minutes before it  
59  
60

1  
2  
3  
4 was centrifuged at 3,000 rpm for 15 minutes. Then, the serum supernatant was collected and  
5  
6 separated into 5 aliquots (200  $\mu$ L per aliquot) and immediately stored in liquid nitrogen.  
7

8  
9 Blood tests were conducted at the certified clinical laboratory of the Shandong Provincial  
10  
11 Hospital Affiliated to Shandong University. We measured a complete blood count, fasting  
12  
13 blood glucose (FBG), liver function, renal function, high-density lipoprotein-cholesterol  
14  
15 (HDL-C), low-density lipoprotein-cholesterol (LDL-C), triglyceride, apolipoprotein  
16  
17 genotyping, homocysteine, supersensitivity C-reactive protein, and insulin. The remaining  
18  
19 serum samples were stored at -80 °C until further analyses. Diabetes was defined as FBG  
20  
21  $\geq 7.0$  mmol/l or current use of blood glucose-lowering agents or insulin injection. High  
22  
23 cholesterol was defined as total cholesterol  $\geq 6.20$  mmol/l or current use of hypolipidaemic  
24  
25 drugs, and dyslipidaemia was defined as total cholesterol  $\geq 6.20$  mmol/l, triglycerides  $\geq 1.8$   
26  
27 mmol/l, HDL-C  $< 1.11$  mmol/l or LDL-C  $\geq 3.36$  mmol/l or current use of hypolipidaemic  
28  
29 drugs.  
30  
31  
32  
33  
34  
35  
36

### 37 *Phase 2*

38  
39 From April to October 2018, participants who were screened positive and their age- and sex-  
40  
41 matched controls screened negative for ICAS by TCD in Phase 1 underwent Phase 2  
42  
43 assessment, which included neuropsychological assessments, structural brain MRI scans, and  
44  
45 MRA.  
46  
47  
48

49  
50 *MRI protocol and acquisition.* All invited participants underwent brain MRI scans on a 3.0T  
51  
52 scanner (Achieve; Philips Medical Systems, Best, The Netherlands) with an 8-channel head  
53  
54 coil. The core MRI protocol included MRA, dynamic susceptibility contrast-enhanced  
55  
56 perfusion-weighted imaging (DSC-PWI), diffusion tensor imaging (DTI), T1-weighted  
57  
58  
59  
60

1  
2  
3  
4 imaging with 3D variable refocusing flip angle volume isotropic turbo spin-echo acquisition  
5  
6 (3D T1VISTA), 3D T2VISTA, fluid-attenuated inversion recovery images, and contrast-  
7  
8 enhanced T1VISTA. The post-enhanced T1VISTA parameters were the same as those used  
9  
10 for pre-T1VISTA. A gadolinium contrast medium (Gd-DTPA, Magnevist, Beijing BeiLu  
11  
12 Pharmaceutical Co., Ltd., Beijing, China) was intravenously injected at the third acquisition  
13  
14 (0.2 mL/kg or 4.5 mL/s followed immediately by a 30 mL physiological saline flush). The  
15  
16 extent of stenosis in the five evaluated arteries (bilateral MCA, bilateral intracranial ICA, and  
17  
18 BA) was classified into five grades by consensus as normal, mild (signal reduction <50%),  
19  
20 moderate (signal reduction  $\geq$ 50% and <70%), severe (signal reduction  $\geq$ 70%), or occlusion  
21  
22 (focal signal loss with the presence of distal signal). The diagnosis and grading of stenosis  
23  
24 was performed by a neurologist specializing in stroke and a clinical neuroradiologist.

25  
26  
27  
28  
29  
30  
31  
32 *Neuropsychological evaluation.* Neuropsychological assessments were performed by  
33  
34 experienced neuropsychologists trained specifically for this project and included tests of  
35  
36 global cognitive function and specific cognitive domains, such as memory, executive  
37  
38 function, attention, visuospatial function, and affection. The Chinese versions of the Mini-  
39  
40 Mental State Examination (MMSE) and the Montreal Cognitive Assessment (MoCA) were  
41  
42 performed to assess global cognitive function[21]. Specific cognitive domains (e.g., episodic  
43  
44 memory, verbal fluency, attention, and executive function) were assessed using the following  
45  
46 neuropsychological tests: (1) the Rey Auditory Verbal Learning Test Learning (AVLT: direct  
47  
48 recall, delayed recall, and word list recognition) for episodic memory[22], the Fuld-object  
49  
50 Memory Evaluation (FOM) for object memory[23], (2) the Category Verbal Fluency test  
51  
52 (CVF) for verbal performance and executive function[24], (3) the Trail Making Test (TMT  
53  
54  
55  
56  
57  
58  
59  
60

1  
2  
3  
4 A&B) for executive function[25], (4) the Wechsler Memory Scale-III Forward Digit Span  
5  
6 (FDS) and Backward Digit Span(BDS) for attention and executive function[26], and (5) the  
7  
8 Wechsler block design test and Clock Drawing Test (CDT) for visuospatial and motor  
9  
10 skills[27]. In addition, depressive symptoms were assessed using the Hamilton depression  
11  
12 Scale (HAMD) [28]. The Barthel index was used to assess basic activities of daily living  
13  
14 (ADL) [29].

15  
16  
17  
18  
19 *Quality control procedure.* Before the beginning of the study, all staff were centrally trained  
20  
21 and required to demonstrate competency to perform different assessments, including  
22  
23 interviews, biospecimen acquisition, cerebrovascular assessments, and cognitive testing.  
24  
25 Psychologists, neuroradiologists, and neurologists attended a standardization meeting to  
26  
27 ensure the consistency of application of the evaluation criteria. The collection and processing  
28  
29 of the data were checked and verified by two or even three people, and the entry of the  
30  
31 collected data was completed via integral double entry.  
32  
33  
34  
35  
36

### 37 ***Statistical Analysis***

38  
39  
40 The data are presented as frequencies (%) for categorical variables and as the mean (SD) or  
41  
42 median (interquartile range, IQR) for continuous variables. Characteristics of the study  
43  
44 participants by sex were compared using the general linear regression model for continuous  
45  
46 variables and chi-square test for categorical variables. We describe the distribution of major  
47  
48 CRFs and aICAS. We used the statistical packages R (<http://www.r-project.org>; version  
49  
50 3.4.3) and EmpowerStats ([www.empowerstats.com](http://www.empowerstats.com); X&Y Solutions Inc.) for all analyses.  
51  
52  
53  
54  
55

### 56 ***Follow-up assessments***



1  
2  
3  
4 All survivors of the baseline participants will be invited to undertake a follow-up evaluation  
5  
6 in the third year. The same questionnaire used for the baseline survey will be used during the  
7  
8 follow-up examination for collecting epidemiological, neuropsychological, and clinical data.  
9  
10  
11 Analysis of biomarkers as well as TCD test, carotid ultrasonography examination, and brain  
12  
13  
14 MRI scan will also be performed.  
15  
16  
17  
18

### 19 **Patient and public involvement**

20  
21  
22 No patients or public were involved in the development of research questions and the design  
23  
24 of the project. However, patients or participants would benefit from participating this project  
25  
26 because health care advices were provided during the examination. Furthermore, in the future  
27  
28 patients may benefit from the knowledge generated from this project once it becomes  
29  
30 publicly available. All participant-related information was de-identified from the database to  
31  
32 preserve privacy.  
33  
34  
35  
36  
37  
38  
39

### 40 **Findings to date**

41  
42  
43 In this ongoing prospective cohort study of middle-aged and older adults who were free of  
44  
45 clinical stroke, we demonstrate the feasibility of a two-phase procedure to study the  
46  
47 epidemiology and nature history of aICAS in rural communities by integrating  
48  
49 epidemiological approaches with clinical, neuroimaging, and neuropsychological techniques.  
50  
51

52  
53 [Table 1](#) summarises the characteristics of baseline participants. The mean age of the  
54  
55 2311 participants was 57.6 years, and 53.4% were women. Compared to men, women were  
56  
57 older, less educated, and less to be single, and had higher levels of total cholesterol,  
58  
59  
60

1  
2  
3  
4 triglycerides, LDL-C, and BMI, but lower levels of diastolic pressure and HDL-C. There was  
5  
6 no significant sex difference in levels of FBG or systolic pressure and prevalence of  
7  
8 hypertension. Men were much more likely to smoke and consume alcohol than women,  
9  
10 whereas women were more likely to be obese. Women had a higher prevalence of diabetes  
11  
12 and higher dyslipidemia levels than men. These results suggested that major CRFs were  
13  
14 highly prevalent in rural-dwelling middle-aged and elderly people in China and that there  
15  
16 were substantial sex differences in certain lifestyle factors, such as smoking and alcohol  
17  
18 consumption, which were highly prevalent only in men (figure 2). Given the well-established  
19  
20 aetiological relationship of CRFs with atherosclerosis and clinical stroke, our study suggests  
21  
22 that active interventions to target these modifiable risk factors are urgently needed to  
23  
24 counteract the huge burden of stroke and dementia in rural areas of China.  
25  
26  
27  
28  
29  
30  
31

32  
33 Of the 2311 participants, 2027 completed the diagnostic procedure for aICAS, and  
34  
35 aICAS was diagnosed in 154 persons (92 women and 62 men), which corresponded to the  
36  
37 overall prevalence of 7.6% (8.7% in women vs. 6.4% in men,  $P=0.055$ ). The prevalence of  
38  
39 aICAS increased with advancing age, from 5.1% in individuals aged 40-49 years to 12.7% in  
40  
41 those aged  $\geq 70$  years (figure 3). A total of 305 intracranial arteries were diagnosed with  
42  
43 aICAS; 221 (72.5%) were involved in ACA, MCA or ICA, and 84 (27.5%) were involved in  
44  
45 PCA, VA or BA (table 2). The distributions of aICAS by regional arteries were as follows:  
46  
47 ACA, 55 (18.0%) arteries; MCA, 95 (31.1%) arteries; ICA, 71 (23.3%) arteries; PCA, 38  
48  
49 (12.5%) arteries; VA, 25 (8.2%) arteries; BA, 21 (6.9%) arteries. The arteries in the anterior  
50  
51 circulation were more frequently involved than arteries in the posterior circulation.  
52  
53  
54  
55  
56  
57  
58  
59  
60

1  
2  
3  
4 Most previous studies have used either TCD or MRA alone to diagnose aICAS, and  
5  
6 different detection approaches and procedures may contribute to the substantial variations in  
7  
8 the reported prevalence of aICAS. For example, the prevalence of aICAS was reported to be  
9  
10 13.2% among coal mine workers aged  $\geq 40$  years in a study that used only TCD to detect  
11  
12 aICAS, whereas another study of people aged  $\geq 40$  years (mean age, 58.1 years) from Korea  
13  
14 reported that the prevalence of aICAS was 24.5% in all intracranial vessels[7]. We used a  
15  
16 two-phase approach that included a screening phase with TCD examination followed by a  
17  
18 diagnostic phase with MRA, and we found that the overall prevalence of aICAS was 7.6% in  
19  
20 this rural-dwelling middle-aged and elderly population. TCD examination, when used as a  
21  
22 tool for detecting arterial stenosis, has the advantage of convenience and non-invasiveness  
23  
24 but also has a high negative predictive value ( $\sim 90\%$ ); thus, TCD is suitable for screening  
25  
26 arterial stenosis in a large-scale population study. However, the positive predictive value of  
27  
28 TCD examination is only  $\sim 50\%$ . In contrast, MRA provides a good positive predictive value  
29  
30 for ICAS but may not be suitable for large-scale community-based studies due to its high  
31  
32 costs and inconvenience[17]. In this study, we combined TCD with MRA to detect aICAS,  
33  
34 which is feasible especially among people who are living in the remote rural communities.  
35  
36 This approach will allow us to obtain a more accurate estimate of aICAS prevalence than that  
37  
38 was achieved in previous studies used either TCD or MRA alone.  
39  
40  
41  
42  
43  
44  
45  
46  
47  
48  
49

50 We also found that the distribution of aICAS was more common in the anterior  
51  
52 circulation than in the posterior circulation, in accordance with a study from Japan[30]. The  
53  
54 variations in the regional arterial distribution of aICAS are likely due to differences in the  
55  
56 anatomical and haemodynamic characteristics between the anterior and posterior circulation.  
57  
58  
59  
60

1  
2  
3  
4 For example, in the anterior circulation, the higher number of vascular branches may increase  
5  
6 the risk of atherosclerosis[31]. In addition, TCD has relatively low sensitivity in detecting  
7  
8 posterior circulation stenosis[32], and this may have contributed, in part, to the differences  
9  
10 observed in the regional arterial distribution of aICAS.  
11  
12

13  
14 In summary, in the community-based KT-aICAS study, aICAS affected nearly one-tenth  
15  
16 of the rural-dwelling middle-aged and elderly residents, and its prevalence increased with  
17  
18 advanced age. Anterior circulation arteries were most vulnerable to atherosclerotic lesions. In  
19  
20 addition, major CRFs were highly prevalent among middle-aged and elderly rural dwellers  
21  
22 who were free of stroke. These findings may have important implications for the primary  
23  
24 prevention of aICAS, clinical stroke, and cognitive impairment. Future follow-up data from  
25  
26 this cohort may contribute to the understanding of the epidemiology and natural history as  
27  
28 well as cognitive consequences of aICAS among rural residents in China.  
29  
30  
31  
32  
33  
34  
35  
36  
37

### 38 **Strengths and Limitations**

39  
40 This cohort study targeted residents living in rural communities in China, to whom the  
41  
42 research community has so far paid little attention. Second, we integrated TCD and MRA  
43  
44 into a two-phase procedure to detect aICAS in a large-scale population study, and this  
45  
46 approach is likely to allow us to obtain a relatively accurate estimate of the prevalence of  
47  
48 aICAS. Furthermore, high-resolution MRI scans could help further evaluate the  
49  
50 characteristics of arterial stenosis and avoid the contamination of ICAS cases with cases  
51  
52 involving other non-atherosclerotic diseases[33]. In addition, high-resolution MRI can be  
53  
54 used to detect intraplaque haemorrhage, lipid cores, and artery fibrous caps, thus providing  
55  
56  
57  
58  
59  
60

1  
2  
3  
4 further insight into the long-term prognosis of aICAS. To the best of our knowledge, this is  
5  
6 the first community-based study of aICAS among an Asian population that used high-  
7  
8 resolution MRI as well as PWI images and DTI images. Finally, this community-based study  
9  
10 includes comprehensive neuropsychological assessments that covers global cognitive  
11  
12 function (MMSE and MoCA) and multiple cognitive domains (e.g., memory, verbal fluency,  
13  
14 attention, and executive function), and thus, will facilitate future exploration of specific  
15  
16 cognitive profiles associated with aICAS and its progression.  
17  
18  
19  
20  
21

22 Our study also has limitations. First, we used TCD as a screening tool for arterial  
23  
24 stenosis, which might have missed some cases of aICAS, and thus, have underestimated the  
25  
26 overall prevalence of aICAS. Furthermore, in case of a poor or incomplete echo window for  
27  
28 TCD, people without any stenosis in the VA, BA, and ACA were considered to be non-  
29  
30 stenotic. This might also have resulted in the underestimation of the true prevalence of aICAS  
31  
32 in this population. Finally, our study sample was selected from only one rural area, and this  
33  
34 should be kept in mind when generalizing our findings to other rural populations.  
35  
36  
37  
38  
39  
40  
41  
42

43 **Acknowledgements** We would like to thank all the study participants, the staff of the  
44  
45 participating hospitals, and the Steering Committee Members of the Kongcun Town Study.  
46  
47

48 **Author Contributions** QS, FX, and YD conceived the research question and designed  
49  
50 the study. XW and FX conducted the statistical analysis, interpreted the results, and wrote the  
51  
52 first and subsequent drafts of the manuscript. XJ, SwS, SS, YZ, PY, SL, FJ, GW, and ML  
53  
54 contributed to the epidemiological investigation. All authors contributed to data interpretation  
55  
56  
57  
58  
59  
60

1  
2  
3  
4 and critical revisions of the manuscript, and approved the final version of the submitted  
5  
6  
7 manuscript.

8  
9 **Funding** This Study was supported by the grants from Jinan Science and Technology  
10  
11 Bureau (201704101), Department of Science and Technology of Shandong Province  
12  
13 (2014GSF118106, 2016GSF201062, and ZR2017MH114), the National Nature Science  
14  
15 Foundation of China (8171101298, 81971128), and the China Ministry of Sciences and  
16  
17 Technology (2017YFC1310100 and 2017YFC0907003). C Qiu received grants from the  
18  
19 Swedish Research Council for the Sino-Sweden Network for Aging Research (2017-00740)  
20  
21 and the Sino-Sweden Joint Research Project (2017-05819), Sweden and the Taishan Oversea  
22  
23 Scholar Program of Shandong Province, China.  
24  
25  
26  
27  
28

29  
30 **Competing interests** None declared.

31  
32 **Participant consent** Obtained.

33  
34  
35 **Ethics approval** Shandong Provincial Hospital Affiliated to Shandong University in  
36  
37 Jinan, Shandong, China (2017566).

38  
39  
40 **Provenance and peer review** Not commissioned; externally peer reviewed.

41  
42  
43 **Data sharing statement** Collaboration is welcomed and data sharing can be agreed  
44  
45 upon. The corresponding author can be contacted.  
46  
47

48  
49 **Open Access** This is an Open Access article distributed in accordance with the Creative  
50  
51 Commons Attribution Non Commercial (CC BY-NC 4.0) license, which permits others to  
52  
53 distribute, remix, adapt, build upon this work non-commercially, and license their derivative  
54  
55 works on different terms, provided the original work is properly cited and the use is non-  
56  
57 commercial.  
58  
59  
60

## References

1. Bos D, Portegies ML, van der Lugt A, Bos MJ, Koudstaal PJ, Hofman A, Krestin GP, Franco OH, Vernooij MW, Ikram MA: **Intracranial carotid artery atherosclerosis and the risk of stroke in whites: the Rotterdam Study.** *JAMA neurology* 2014, **71**(4):405-411.
2. Beach TG, Wilson JR, Sue LI, Newell A, Poston M, Cisneros R, Pandya Y, Esh C, Connor DJ, Sabbagh M *et al*: **Circle of Willis atherosclerosis: association with Alzheimer's disease, neuritic plaques and neurofibrillary tangles.** *Acta neuropathologica* 2007, **113**(1):13-21.
3. Battistella V, Elkind M: **Intracranial atherosclerotic disease.** *European journal of neurology* 2014, **21**(7):956-962.
4. Parfenov VA, Ostroumova OD, Ostroumova TM, Kochetkov AI, Fateeva VV, Khacheva KK, Khakimova GR, Epstein OI: **Vascular cognitive impairment: pathophysiological mechanisms, insights into structural basis, and perspectives in specific treatments.** *Neuropsychiatric disease and treatment* 2019, **15**:1381-1402.
5. Lopez-Cancio E, Dorado L, Millan M, Reverte S, Sunol A, Massuet A, Galan A, Alzamora MT, Pera G, Toran P *et al*: **The Barcelona-Asymptomatic Intracranial Atherosclerosis (AsIA) study: prevalence and risk factors.** *Atherosclerosis* 2012, **221**(1):221-225.
6. Suri MF, Qiao Y, Ma X, Guallar E, Zhou J, Zhang Y, Liu L, Chu H, Qureshi AI, Alonso A *et al*: **Prevalence of Intracranial Atherosclerotic Stenosis Using High-Resolution Magnetic Resonance Angiography in the General Population: The Atherosclerosis Risk in Communities Study.** *Stroke* 2016, **47**(5):1187-1193.
7. Bae HJ, Lee J, Park JM, Kwon O, Koo JS, Kim BK, Pandey DK: **Risk factors of intracranial cerebral atherosclerosis among asymptomatics.** *Cerebrovascular diseases (Basel, Switzerland)* 2007, **24**(4):355-360.
8. Wang A, Li Z, Luo Y, Liu X, Guo X, Wu S, Zhao X, Jonas JB: **Asymptomatic intracranial arterial stenosis and metabolic syndrome: the APAC study.** *PloS one* 2014, **9**(12):e113205.
9. Wong KS, Ng PW, Tang A, Liu R, Yeung V, Tomlinson B: **Prevalence of asymptomatic intracranial atherosclerosis in high-risk patients.** *Neurology* 2007, **68**(23):2035-2038.
10. Huang HW, Guo MH, Lin RJ, Chen YL, Luo Q, Zhang Y, Wong KS: **Prevalence and risk factors of middle cerebral artery stenosis in asymptomatic residents in Rongqi County, Guangdong.** *Cerebrovascular diseases (Basel, Switzerland)* 2007, **24**(1):111-115.
11. Song A, Liang Y, Yan Z, Sun B, Cai C, Jiang H, Qiu C: **Highly prevalent and poorly controlled cardiovascular risk factors among Chinese elderly people living in the rural community.** *European journal of preventive cardiology* 2014, **21**(10):1267-1274.
12. Nahab F, Cotsonis G, Lynn M, Feldmann E, Chaturvedi S, Hemphill JC, Zweifler R, Johnston K, Bonovich D, Kasner S *et al*: **Prevalence and prognosis of coexistent asymptomatic intracranial stenosis.** *Stroke* 2008, **39**(3):1039-1041.
13. Ni J, Yao M, Gao S, Cui LY: **Stroke risk and prognostic factors of asymptomatic middle cerebral artery atherosclerotic stenosis.** *Journal of the neurological sciences* 2011, **301**(1-2):63-65.
14. Lou X, Ma X, Liebeskind DS, Ma N, Tian C, Lyu J, Long X, Ma L, Wang DJ: **Collateral perfusion using arterial spin labeling in symptomatic versus asymptomatic middle cerebral artery stenosis.** *Journal of cerebral blood flow and metabolism : official journal of the International Society of Cerebral Blood Flow and Metabolism* 2019, **39**(1):108-117.
15. Matsui R, Nakagawa T, Takayoshi H, Onoda K, Oguro H, Nagai A, Yamaguchi S: **A Prospective Study of Asymptomatic Intracranial Atherosclerotic Stenosis in Neurologically Normal Volunteers in a Japanese Cohort.** *Frontiers in neurology* 2016, **7**:39.

16. Meng Y, Yu K, Zhang L, Liu Y: **Cognitive Decline in Asymptomatic Middle Cerebral Artery Stenosis Patients with Moderate and Poor Collaterals: A 2-Year Follow-Up Study.** *Medical science monitor : international medical journal of experimental and clinical research* 2019, **25**:4051-4058.
17. Feldmann E, Wilterdink JL, Kosinski A, Lynn M, Chimowitz MI, Sarafin J, Smith HH, Nichols F, Rogg J, Cloft HJ *et al*: **The Stroke Outcomes and Neuroimaging of Intracranial Atherosclerosis (SONIA) trial.** *Neurology* 2007, **68**(24):2099-2106.
18. Tsvigoulis G, Sharma VK, Hoover SL, Lao AY, Ardelt AA, Malkoff MD, Alexandrov AV: **Applications and advantages of power motion-mode Doppler in acute posterior circulation cerebral ischemia.** *Stroke* 2008, **39**(4):1197-1204.
19. Zhao L, Barlinn K, Sharma VK, Tsvigoulis G, Cava LF, Vasdekis SN, Teoh HL, Triantafyllou N, Chan BP, Sharma A *et al*: **Velocity criteria for intracranial stenosis revisited: an international multicenter study of transcranial Doppler and digital subtraction angiography.** *Stroke* 2011, **42**(12):3429-3434.
20. Mozzini C, Roscia G, Casadei A, Cominacini L: **Searching the perfect ultrasonic classification in assessing carotid artery stenosis: comparison and remarks upon the existing ultrasound criteria.** *Journal of ultrasound* 2016, **19**(2):83-90.
21. Hu JB, Zhou WH, Hu SH, Huang ML, Wei N, Qi HL, Huang JW, Xu Y: **Cross-cultural difference and validation of the Chinese version of Montreal Cognitive Assessment in older adults residing in Eastern China: preliminary findings.** *Archives of gerontology and geriatrics* 2013, **56**(1):38-43.
22. Brugnolo A, Morbelli S, Arnaldi D, De Carli F, Accardo J, Bossert I, Dessi B, Fama F, Ferrara M, Girtler N *et al*: **Metabolic correlates of Rey auditory verbal learning test in elderly subjects with memory complaints.** *Journal of Alzheimer's disease : JAD* 2014, **39**(1):103-113.
23. Anderson-Hanley C, Miele AS, Dunnam M: **The fuld object-memory evaluation: development and validation of an alternate form.** *Applied neuropsychology Adult* 2013, **20**(1):1-6.
24. Whiteside DM, Kealey T, Semla M, Luu H, Rice L, Basso MR, Roper B: **Verbal Fluency: Language or Executive Function Measure?** *Applied neuropsychology Adult* 2016, **23**(1):29-34.
25. Misdraji EL, Gass CS: **The Trail Making Test and its neurobehavioral components.** *Journal of clinical and experimental neuropsychology* 2010, **32**(2):159-163.
26. Giofre D, Stoppa E, Ferioli P, Pezzuti L, Cornoldi C: **Forward and backward digit span difficulties in children with specific learning disorder.** *Journal of clinical and experimental neuropsychology* 2016, **38**(4):478-486.
27. Sands LP, Terry H, Meredith W: **Change and stability in adult intellectual functioning assessed by Wechsler item responses.** *Psychology and aging* 1989, **4**(1):79-87.
28. Worboys M: **The Hamilton Rating Scale for Depression: The making of a "gold standard" and the unmaking of a chronic illness, 1960-1980.** *Chronic illness* 2013, **9**(3):202-219.
29. Mlinac ME, Feng MC: **Assessment of Activities of Daily Living, Self-Care, and Independence.** *Archives of clinical neuropsychology : the official journal of the National Academy of Neuropsychologists* 2016, **31**(6):506-516.
30. Uehara T, Tabuchi M, Mori E: **Frequency and clinical correlates of occlusive lesions of cerebral arteries in Japanese patients without stroke. Evaluation by MR angiography.** *Cerebrovascular diseases (Basel, Switzerland)* 1998, **8**(5):267-272.
31. Arkuszewski M, Swiat M, Hurst RW, Weigele JB, Al-Okaili RN, Kasner SE, Melhem ER, Krejza J: **Vertebral and Basilar Arteries: Transcranial Color-Coded Duplex Ultrasonography versus Conventional TCD in Detection of Narrowings.** *The neuroradiology journal* 2012, **25**(5):509-514.
32. Xu WH, Li ML, Gao S, Ni J, Zhou LX, Yao M, Peng B, Feng F, Jin ZY, Cui LY: **Plaque distribution of stenotic**



1  
2  
3  
4  
5  
6  
7  
8  
9  
10  
11  
12  
13  
14  
15  
16  
17  
18  
19  
20  
21  
22  
23  
24  
25  
26  
27  
28  
29  
30  
31  
32  
33  
34  
35  
36  
37  
38  
39  
40  
41  
42  
43  
44  
45  
46  
47  
48  
49  
50  
51  
52  
53  
54  
55  
56  
57  
58  
59  
60

33. **middle cerebral artery and its clinical relevance.** *Stroke* 2011, **42**(10):2957-2959.  
Jung SC, Kang DW, Turan TN: **Vessel and Vessel Wall Imaging.** *Frontiers of neurology and neuroscience* 2016, **40**:109-123.

For peer review only

**Table 1.** Characteristics of the study participants by gender

| Characteristics <sup>b</sup>                    | Total<br>(n=2311) | Men<br>(n=1076) | Women<br>(n=1235) | P <sup>a</sup> |
|-------------------------------------------------|-------------------|-----------------|-------------------|----------------|
| Age (years), mean (SD)                          | 57.6(10.5)        | 56.3(10.3)      | 58.8(10.5)        | <0.001         |
| Age group (years), n(%)                         |                   |                 |                   | <0.001         |
| 40-49                                           | 613(26.6)         | 353(32.9)       | 260(21.1)         |                |
| 50-59                                           | 733(31.8)         | 334(31.1)       | 399(32.4)         |                |
| 60-69                                           | 607(26.3)         | 240(22.3)       | 367(29.8)         |                |
| ≥70                                             | 352(15.3)         | 147(13.7)       | 205(16.7)         |                |
| Marriage states, n (%)                          |                   |                 |                   | <0.001         |
| Married                                         | 252(10.9)         | 72(6.7)         | 180(14.6)         |                |
| Single status                                   | 2058(89.1)        | 1003(93.3)      | 1055(85.4)        |                |
| Educational level, n (%)                        |                   |                 |                   | <0.001         |
| Illiterate                                      | 354(15.3)         | 36(3.3)         | 318(25.8)         |                |
| Elementary                                      | 679(29.4)         | 247(23.0)       | 432(35.0)         |                |
| Middle school                                   | 976(42.3)         | 582(54.1)       | 394(31.9)         |                |
| High school and above                           | 301(13.0)         | 211(19.6)       | 90(7.3)           |                |
| Body mass index (kg/m <sup>2</sup> ), mean (SD) | 25.2(3.8)         | 24.8(3.2)       | 25.5(4.1)         | <0.001         |
| Systolic pressure (mm Hg), mean (SD)            | 145.0(22.4)       | 144.5(21.3)     | 145.4(23.4)       | 0.365          |
| Diastolic pressure (mm Hg), mean (SD)           | 88.3(12.7)        | 89.9(13.0)      | 86.9(12.2)        | <0.001         |
| Fasting blood glucose (mmol/l), mean (SD)       | 6.1(1.8)          | 6.0(1.8)        | 6.1(1.9)          | 0.084          |
| LDL-C (mmol/l), mean (SD)                       | 3.0(0.7)          | 2.9(0.7)        | 3.1(0.7)          | <0.001         |
| HDL-C (mmol/l), mean (SD)                       | 1.6(0.4)          | 1.6(0.4)        | 1.6(0.3)          | 0.031          |
| Triglycerides (mmol/l), mean (SD)               | 1.4(0.9)          | 1.3(0.9)        | 1.5(0.9)          | <0.001         |
| Total cholesterol (mmol/l), mean (SD)           | 5.4(1.0)          | 5.2(0.9)        | 5.5(1.0)          | <0.001         |
| Smoking, n (%)                                  | 504(21.9)         | 489(45.6)       | 15(1.2)           | <0.001         |
| Alcohol consumption ,n (%)                      | 727(31.5)         | 672(62.5)       | 55(4.5)           | <0.001         |
| Obesity, n (%)                                  | 437(19.2)         | 165(15.5)       | 272(22.5)         | <0.001         |
| Dyslipidemia, n (%)                             | 922(41.7)         | 378(36.2)       | 544(46.7)         | <0.001         |
| Hypertension, n (%)                             | 1294(56.6)        | 592(55.3)       | 702(57.8)         | 0.220          |
| Diabetes , n (%)                                | 725(32.9)         | 319(30.5)       | 406(34.9)         | 0.028          |

|              |          |         |         |       |
|--------------|----------|---------|---------|-------|
| aICAS, n (%) | 154(7.6) | 62(6.4) | 92(8.6) | 0.055 |
|--------------|----------|---------|---------|-------|

HDL-C: high-density lipoprotein cholesterol; LDL-C: low-density lipoprotein cholesterol; SD: standard deviation; aICAS: asymptomatic intracranial artery stenosis.

<sup>a</sup>P values were for the test of differences between male and female. <sup>b</sup>The numbers of participants with missing value were 1 for marriage states and educational level, 38 for body mass index, 29 for blood pressure, 175 for fasting blood glucose, 106 for LDL-C, HDL-C, triglycerides and total cholesterol, 8 for smoking, 2 for alcohol consumption, and 38 for obese status, 102 for dyslipidemia, 26 for hypertension, 104 for diabetic status, and 284 for aICAS (participants completed the diagnostic procedure for aICAS was 2027) .

For peer review only

**Table 2.** Arterial distribution of asymptomatic intracranial atherosclerotic stenosis (aICAS) according to severity of stenosis (Total number of arteries with aICAS = 305)

| Arteries | Severity of intracranial arterial stenosis, n (%) |          |          |           |          |
|----------|---------------------------------------------------|----------|----------|-----------|----------|
|          | Mild                                              | Moderate | Severe   | Occlusion | Total    |
| ICA      | 28 (9.2)                                          | 20 (6.6) | 17 (5.6) | 6 (2.0)   | 71(23.3) |
| MCA      | 45 (14.8)                                         | 21 (6.9) | 23 (7.6) | 6 (2.0)   | 95(31.2) |
| ACA      | 22 (7.2)                                          | 17 (5.6) | 16 (5.3) | 0 (0.0)   | 55(18.0) |
| PCA      | 10 (3.3)                                          | 9 (3.0)  | 18 (5.9) | 1 (0.3)   | 38(12.5) |
| VA       | 4 (1.3)                                           | 2 (0.7)  | 8 (2.6)  | 11 (3.3)  | 25(8.2)  |
| BA       | 13 (4.3)                                          | 3 (1.0)  | 5 (1.6)  | 0 (0.0)   | 21(6.9)  |

MCA, middle cerebral artery; ACA, anterior cerebral artery; ICA, intracranial internal carotid artery; PCA, posterior cerebral artery; VA, vertebral artery; BA, basilar artery.

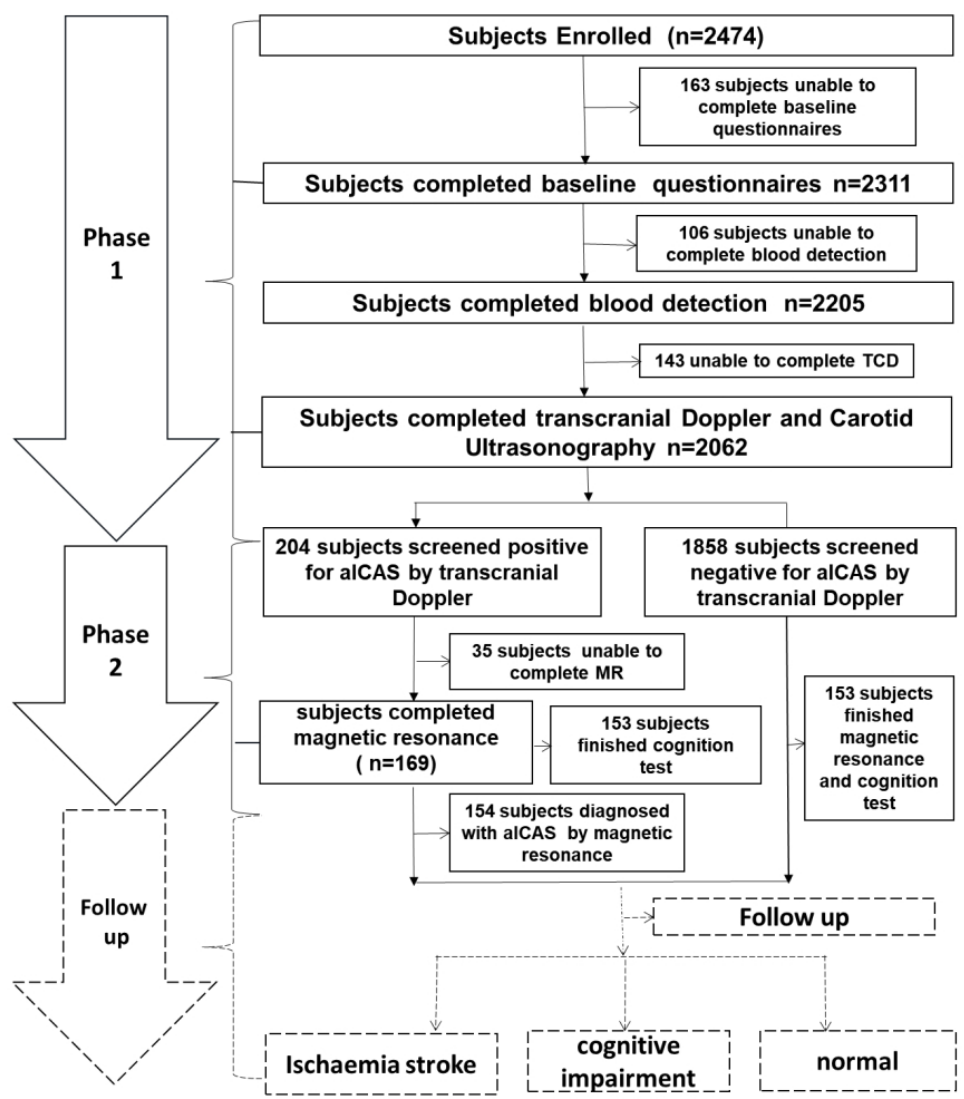

Figure 1 Flowchart of the study

316x353mm (72 x 72 DPI)

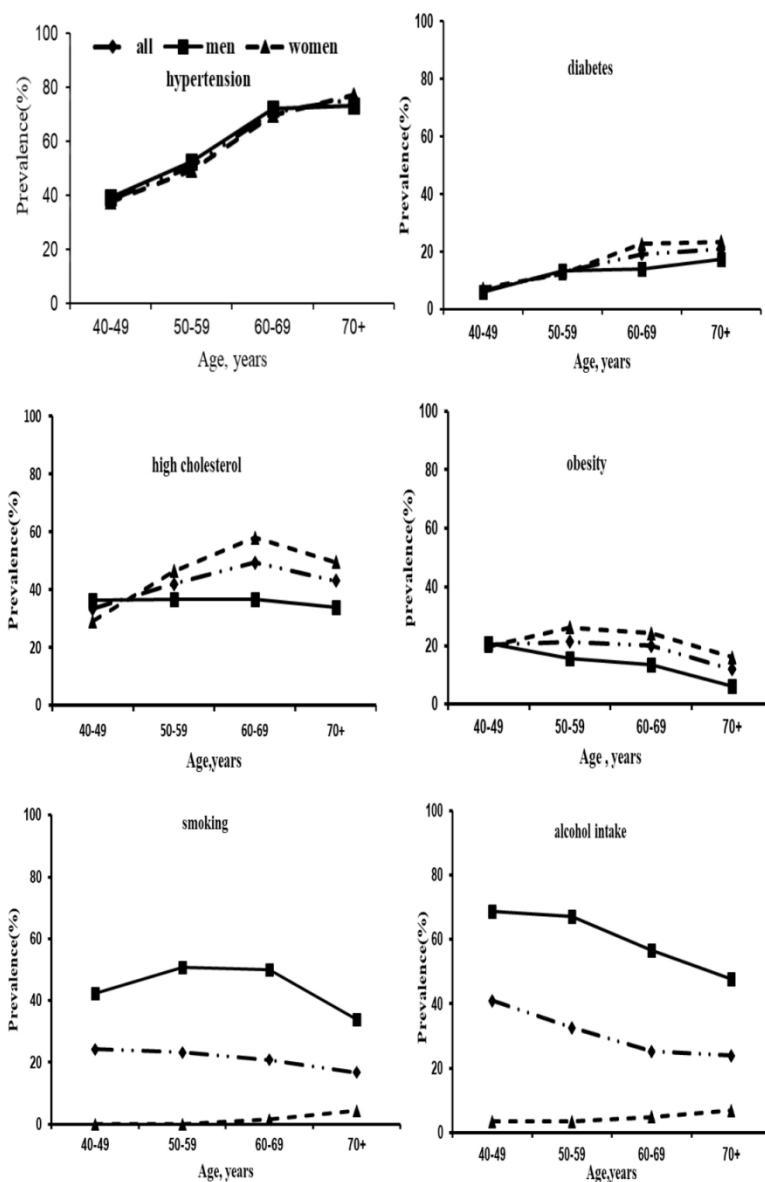

Figure 2 Age- and gender-specific prevalence (per 100 population) of cardiovascular risk factors

101x145mm (300 x 300 DPI)

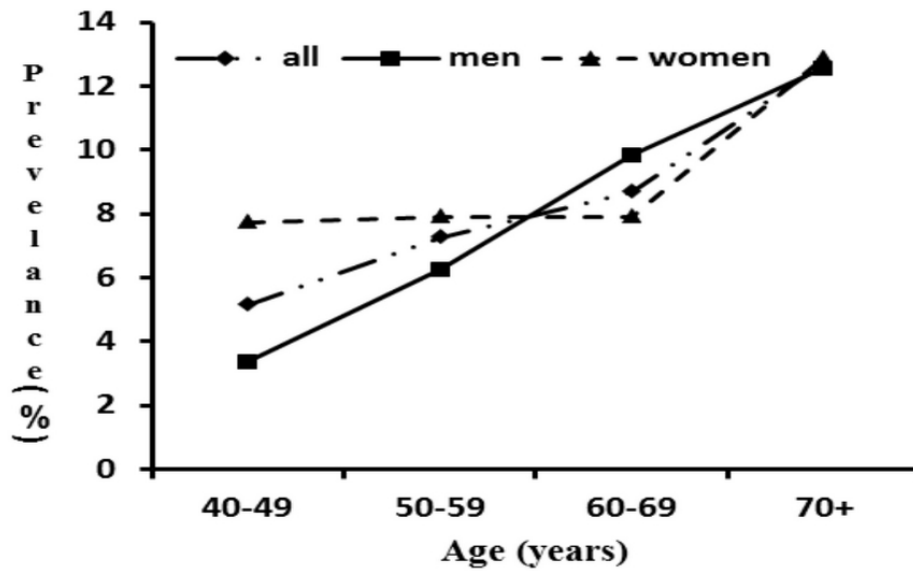

all: P for trend<0.001; Men: P for trend<0.001; Women: P for trend =0.140

Figure 3 Age- and gender-specific prevalence (per 100 population) of aICAS

78x56mm (300 x 300 DPI)

# BMJ Open

## Cohort profile: the Kongcun Town Asymptomatic Intracranial Artery Stenosis Study in Shandong, China

|                                 |                                                                                                                                                                                                                                                                                                                                                                                                                                                                                                                                                                                                                                                                                                                                                                                                                                                                                                                                                                                                                                                                                                                                                                                                                |
|---------------------------------|----------------------------------------------------------------------------------------------------------------------------------------------------------------------------------------------------------------------------------------------------------------------------------------------------------------------------------------------------------------------------------------------------------------------------------------------------------------------------------------------------------------------------------------------------------------------------------------------------------------------------------------------------------------------------------------------------------------------------------------------------------------------------------------------------------------------------------------------------------------------------------------------------------------------------------------------------------------------------------------------------------------------------------------------------------------------------------------------------------------------------------------------------------------------------------------------------------------|
| Journal:                        | <i>BMJ Open</i>                                                                                                                                                                                                                                                                                                                                                                                                                                                                                                                                                                                                                                                                                                                                                                                                                                                                                                                                                                                                                                                                                                                                                                                                |
| Manuscript ID                   | bmjopen-2019-036454.R1                                                                                                                                                                                                                                                                                                                                                                                                                                                                                                                                                                                                                                                                                                                                                                                                                                                                                                                                                                                                                                                                                                                                                                                         |
| Article Type:                   | Cohort profile                                                                                                                                                                                                                                                                                                                                                                                                                                                                                                                                                                                                                                                                                                                                                                                                                                                                                                                                                                                                                                                                                                                                                                                                 |
| Date Submitted by the Author:   | 17-Mar-2020                                                                                                                                                                                                                                                                                                                                                                                                                                                                                                                                                                                                                                                                                                                                                                                                                                                                                                                                                                                                                                                                                                                                                                                                    |
| Complete List of Authors:       | Wang, Xiang ; Shandong Provincial Hospital, Department of Neurology<br>Zhao, Yuanyuan; Shandong Provincial Hospital, Department of Neurology<br>Ji, Xiaokang; Shandong University School of Public Health, Department of biostatistics<br>Sang, Shaowei; Shandong University Qilu Hospital, Department of clinical epidemiology<br>Shao, Sai; Shandong Medical Imaging Research Institute, Department of Radiology<br>Yan, Peng; Shandong Provincial Hospital, Department of Neurology<br>Li, Shan; Shandong Provincial Hospital, Department of Neurology<br>Li, JiFeng; Shandong Provincial Hospital, Department of Neurology<br>Wang, Guangbin; Shandong Medical Imaging Research Institute, Department of Radiology<br>Lu, Ming; Shandong University, Department of clinical epidemiology<br>Du, YiFeng; Shandong Provincial Hospital, Department of Neurology<br>Xue, Fuzhong; Shandong University School of Public Health, Department of biostatistics<br>Qiu, Chengxuan; Shandong Provincial Hospital, Department of Neurology; Karolinska Institutet-Stockholm University, Department of Neurobiology, Care Sciences and Society<br>Sun, QinJian; Shandong Provincial Hospital, Department of Neurology |
| <b>Primary Subject Heading</b>: | Epidemiology                                                                                                                                                                                                                                                                                                                                                                                                                                                                                                                                                                                                                                                                                                                                                                                                                                                                                                                                                                                                                                                                                                                                                                                                   |
| Secondary Subject Heading:      | Cardiovascular medicine, Epidemiology, Neurology, Radiology and imaging                                                                                                                                                                                                                                                                                                                                                                                                                                                                                                                                                                                                                                                                                                                                                                                                                                                                                                                                                                                                                                                                                                                                        |
| Keywords:                       | EPIDEMIOLOGY, Neurology < INTERNAL MEDICINE, Magnetic resonance imaging < RADIOLOGY & IMAGING, STROKE MEDICINE, VASCULAR MEDICINE                                                                                                                                                                                                                                                                                                                                                                                                                                                                                                                                                                                                                                                                                                                                                                                                                                                                                                                                                                                                                                                                              |
|                                 |                                                                                                                                                                                                                                                                                                                                                                                                                                                                                                                                                                                                                                                                                                                                                                                                                                                                                                                                                                                                                                                                                                                                                                                                                |

SCHOLARONE™  
Manuscripts





I, the Submitting Author has the right to grant and does grant on behalf of all authors of the Work (as defined in the below author licence), an exclusive licence and/or a non-exclusive licence for contributions from authors who are: i) UK Crown employees; ii) where BMJ has agreed a CC-BY licence shall apply, and/or iii) in accordance with the terms applicable for US Federal Government officers or employees acting as part of their official duties; on a worldwide, perpetual, irrevocable, royalty-free basis to BMJ Publishing Group Ltd ("BMJ") its licensees and where the relevant Journal is co-owned by BMJ to the co-owners of the Journal, to publish the Work in this journal and any other BMJ products and to exploit all rights, as set out in our [licence](#).

The Submitting Author accepts and understands that any supply made under these terms is made by BMJ to the Submitting Author unless you are acting as an employee on behalf of your employer or a postgraduate student of an affiliated institution which is paying any applicable article publishing charge ("APC") for Open Access articles. Where the Submitting Author wishes to make the Work available on an Open Access basis (and intends to pay the relevant APC), the terms of reuse of such Open Access shall be governed by a Creative Commons licence – details of these licences and which [Creative Commons](#) licence will apply to this Work are set out in our licence referred to above.

Other than as permitted in any relevant BMJ Author's Self Archiving Policies, I confirm this Work has not been accepted for publication elsewhere, is not being considered for publication elsewhere and does not duplicate material already published. I confirm all authors consent to publication of this Work and authorise the granting of this licence.

1  
2  
3  
4 **Cohort profile: the Kongcun Town Asymptomatic Intracranial Artery Stenosis Study in**  
5  
6 **Shandong, China**  
7  
8  
9  
10  
11  
12  
13

14 Xiang Wang<sup>a</sup>, Yuanyuan Zhao<sup>a</sup>, Xiaokang Ji<sup>b</sup>, Shaowei Sang<sup>c</sup>, Sai Shao<sup>d</sup>, Peng Yan<sup>a</sup>, Shan  
15  
16 Li<sup>a</sup>, Jifeng Li<sup>a</sup>, Guangbin Wang<sup>d</sup>, Ming Lv<sup>c</sup>, Yifeng Du<sup>a</sup>, Fuzhong Xue<sup>b</sup>, Chengxuan Qiu<sup>a,e</sup>,  
17  
18 Qinjian Sun<sup>a,\*</sup>  
19  
20  
21  
22  
23  
24  
25  
26

27 <sup>a</sup>Department of Neurology, Shandong Provincial Hospital Affiliated to Shandong University,  
28  
29 Jinan, Shandong, China  
30  
31  
32

33 <sup>b</sup>Department of Biostatistics, School of Public Health, Shandong University, Jinan, Shandong,  
34  
35 China  
36  
37  
38

39 <sup>c</sup>Department of Clinical Epidemiology, Qilu Hospital Affiliated to Shandong University, Jinan,  
40  
41 Shandong, China  
42  
43  
44

45 <sup>d</sup>Department of Radiology, Shandong Medical Imaging Research Institute Affiliated to  
46  
47 Shandong University, Jinan, Shandong, China  
48  
49  
50

51 <sup>e</sup>Aging Research Center, Department of Neurobiology, Care Science and Society, Karolinska  
52  
53 Institutet-Stockholm University, Stockholm, Sweden  
54  
55  
56  
57  
58  
59  
60

1  
2  
3  
4 **Running title:** The Kongcun Town Asymptomatic ICAS Study  
5  
6  
7

8 **Word count:** 3920  
9  
10  
11  
12  
13  
14

15 \*Corresponding author:  
16  
17

18  
19 Qinjian Sun, Department of Neurology, Shandong Provincial Hospital Affiliated to Shandong  
20  
21 University, # 324 Jingwu Weiqi Road, Jinan, Shandong 250021, P. R. China.  
22  
23

24 Email: sqj1210@163.com  
25  
26  
27  
28  
29  
30  
31  
32  
33  
34  
35  
36  
37  
38  
39  
40  
41  
42  
43  
44  
45  
46  
47  
48  
49  
50  
51  
52  
53  
54  
55  
56  
57  
58  
59  
60

## ABSTRACT

**Purpose:** The population-based Kongcun Town Asymptomatic Intracranial Artery Stenosis (KT-aICAS) study aims to investigate the prevalence and major cardiovascular risk factors (CRFs) or biomarkers related to the development and prognosis of aICAS.

**Participants:** The KT-aICAS study included 2311 rural residents who were aged  $\geq 40$  years and living in Kongcun Town, Shandong Province, China. Baseline examination was conducted from October 2017 to October 2018, during which information on demographics, socioeconomics, personal and family medical history, and lifestyle factors was collected through face-to-face interviews, physical examination, and blood tests. Asymptomatic ICAS was initially screened using transcranial Doppler examination and then diagnosed using magnetic resonance angiography. Atherosclerosis in carotid arteries was diagnosed via carotid ultrasonography. High-resolution magnetic resonance imaging was further used to evaluate the vessel wall of aICAS. Neuropsychological assessments were performed in the participants diagnosed with aICAS.

**Findings to date:** Of the 2311 participants, 2027 (87.7%) completed the diagnostic procedure and aICAS was detected in 154 persons, resulting in an overall prevalence of 7.6%. The prevalence of aICAS increased with advancing age from 5.1% in participants aged 40-49 years to 12.7% in those aged  $\geq 70$  years ( $P < 0.001$ ). Asymptomatic ICAS was detected in 305 intracranial arteries, including 221 (72.5%) in the anterior circulation and 84 (27.5%) in the posterior circulation ( $P < 0.001$ ). In addition, major CRFs were highly prevalent among middle-aged and elderly rural dwellers who were free of clinical stroke.

1  
2  
3  
4 **Future plans:** Follow-up examinations will be performed every 3 years following the  
5  
6 baseline examination. This study will increase our knowledge about the natural history of  
7  
8 aICAS and facilitate studies of aICAS-associated disorders among rural-dwelling Chinese  
9  
10 adults, such as ischaemic stroke and vascular cognitive impairment.  
11  
12  
13  
14  
15  
16  
17  
18

### 19 **Strengths and limitations of this study**

- 20  
21  
22  
23 ➤ This population-based study integrated TCD and MRA to detect aICAS among residents  
24  
25 living in rural communities, which is a feasible approach to obtain a relatively accurate  
26  
27 prevalence of aICAS in rural residents.  
28  
29  
30 ➤ High-resolution MRI scans were used to further identify characteristics of aICAS.  
31  
32  
33 ➤ Neuropsychological evaluation in this study covers global cognitive function and  
34  
35 multiple cognitive domains.  
36  
37  
38 ➤ This study used TCD as a screening tool for aICAS, which might have missed some  
39  
40 cases and underestimated the prevalence of aICAS.  
41  
42  
43 ➤ The study sample was selected from only one rural area, and thus, cautiousness is needed  
44  
45 when generalizing the study findings to other rural populations in China.  
46  
47  
48  
49  
50  
51  
52  
53  
54  
55  
56  
57  
58  
59  
60

## INTRODUCTION

Intracranial artery stenosis (ICAS) due to atherosclerosis is a leading cause of ischaemic stroke worldwide, especially in Asian populations[1]. In addition, intracranial atherosclerosis has been associated with cognitive impairment [2]. Atherosclerotic lesions may develop and progress silently over years, subsequently impair cognitive function, or even suddenly cause clinical stroke. Therefore, the detection of ICAS in the asymptomatic phase may facilitate early preventive and therapeutic interventions, and thus delay the progression to symptomatic stroke and cognitive impairment[3, 4]. Several population-based studies that investigated the prevalence of asymptomatic ICAS (aICAS, ie, ICAS without a history of stroke) by using non-invasive tools, such as transcranial ultrasound or magnetic resonance angiography (MRA), suggested that the prevalence of aICAS ranged from around 9% in Caucasian populations[5, 6] and 12% in African-Americans [6] to as high as 24.5% in Asian populations[7-10]. The substantial racial differences in the prevalence and distribution of ICAS could be due partly to different genetic and environmental factors [11]. Therefore, this study about Asian populations who are more vulnerable to ICAS may shed light on the effects of genetic backgrounds, circumstances or social customs, and habits difference on the development of ICAS. Moreover, data remain limited with regard to the prevalence of aICAS among rural residents in China, where cardiovascular risk factors (CRFs) are highly prevalent and poorly controlled[12].

Furthermore, the natural history and prognosis of aICAS remains poorly understood. The Warfarin versus Aspirin Symptomatic Intracranial Disease trial showed that the risk of stroke from aICAS was relatively low among patients with co-existing symptomatic ICAS

1  
2  
3  
4 and aICAS[13]. In addition, asymptomatic atherosclerotic stenosis of the middle cerebral  
5  
6 artery (MCA) is apparently not a malignant disease[14, 15]. These studies suggest that aICAS  
7  
8 may have a benign long-term prognosis. It is worth noting that these previous studies have  
9  
10 either focused on selective patient groups (co-existence of asymptomatic and symptomatic  
11  
12 stenosis) or targeted special vessels (e.g., MCA), and the general population-based studies  
13  
14 that aimed at investigating the prognosis of aICAS remain scarce. Indeed, a population-based  
15  
16 prospective study of 2807 healthy volunteers (mean age, 62.0 years) in Japan found that  
17  
18 aICAS was a risk factor for clinical stroke[16]. However, the predictors for the conversion  
19  
20 and progression of aICAS to the symptomatic stage remain largely unclear.  
21  
22  
23  
24  
25  
26

27 Symptomatic ICAS (i.e., ICAS with a history of stroke) is an independent risk factor for  
28  
29 cognitive decline. However, whether aICAS is associated with subsequent cognitive decline  
30  
31 remains to be explored. Recently, a clinical-based study suggested that in participants with  
32  
33 asymptomatic severe MCA stenosis, poor collateral circulation was associated with declines  
34  
35 in multiple cognitive domains characterized by vascular cognitive impairment[17]. The  
36  
37 association between cognitive function and aICAS in other intracranial arteries remains to be  
38  
39 clarified.  
40  
41  
42  
43  
44

45 Therefore, we initiated the Kongcun Town aICAS (KT-aICAS) study in Shandong  
46  
47 Province, China. This cohort profile aimed to describe the establishment of the study cohort,  
48  
49 baseline assessments, and some of the findings from this cohort.  
50  
51  
52  
53  
54

## 55 **Cohort description**

### 56 ***Study Design and Purposes***

1  
2  
3  
4 KT-aICAS is designed as a population-based prospective cohort study. The purposes of the  
5  
6 KT-aICAS were: (1) to investigate occurrence (e.g., prevalence and incidence) and  
7  
8 distribution of aICAS among middle-aged and older adults living in rural communities; (2) to  
9  
10 explore CRFs of aICAS and clinical biomarkers that may predict the progression from aICAS  
11  
12 to ischaemic stroke; (3) to assess the association between aICAS and cognitive impairment;  
13  
14 and (4) to build a comprehensive database that facilitates longer-term multidisciplinary  
15  
16 research regarding the biomedical, clinical, neuroimaging, and epidemiological aspects of  
17  
18 aICAS. At baseline, a cross-sectional study was conducted to detect the prevalence and  
19  
20 distribution of aICAS. A subsequent follow-up assessment will be performed to determine  
21  
22 the incidence rates of aICAS, examine the association between aICAS and ischaemic stroke  
23  
24 or cognitive impairment, and explore a variety of CRFs, clinical features, imaging markers or  
25  
26 biomarkers for the conversion from aICAS to symptomatic ICAS, clinical stroke, and the  
27  
28 potential cognitive consequences.  
29  
30  
31  
32  
33  
34  
35  
36

### 37 ***Study Communities and Population***

38  
39  
40 The KT-aICAS Study targeted all registered residents who were aged  $\geq 40$  years, free of a  
41  
42 history of stroke, and living in the Kongcun Town of Pingyin county in Shandong Province in  
43  
44 October 2017. Kongcun Town is a rural township that is located  $\sim 76$  km west of Jinan, the  
45  
46 capital of Shandong Province, China. Kongcun Town includes  $\sim 30000$  residents in an area of  
47  
48  $\sim 5000$  hectares. The majority of people in the town are farmers. Since the 2000s, the School  
49  
50 of Public Health at Shandong University has been working closely with the town government  
51  
52 and local health professionals to promote the health of local residents. This helped improve  
53  
54 the cooperation from local residents (e.g., high participation rate at baseline and possibly high  
55  
56  
57  
58  
59  
60



1  
2  
3  
4 adherence to future follow-ups) for implementing this project. Following the baseline  
5  
6 assessment in 2017-2018, all participants will be invited to undertake a follow-up assessment  
7  
8 every 3 years with the aim of detecting patients with aICAS and identifying incident clinical  
9  
10 stroke and cognitive impairment. [Figure 1](#) shows the basic design of the KT-aICAS Study  
11  
12 and the flowchart of the study population and assessments.  
13  
14  
15

### 16 17 ***Ethics Approval and Consent to Participate***

18  
19 The protocol of the KT-aICAS Study was reviewed and approved by the ethical standards  
20  
21 committees on human experimentation at Shandong Provincial Hospital Affiliated to  
22  
23 Shandong University. Written informed consent was obtained from all of the participants.  
24  
25 The study was conducted in accordance with the principles for medical research involving  
26  
27 human subjects expressed in the Declaration of Helsinki. The face-to-face interviews were  
28  
29 scheduled at the most convenient times for the participants. Respondents were free to refuse  
30  
31 participation or withdraw from the study at any time. Any case of serious illness that had not  
32  
33 been detected previously, was urgently referred to the local hospital for further examinations.  
34  
35 All participant-related information was de-identified from the database to preserve privacy.  
36  
37  
38  
39  
40  
41  
42  
43  
44  
45

### 46 47 ***Baseline Assessments***

48  
49 Baseline assessments were performed in October 2017-October 2018, which included a two-  
50  
51 phase design as described below.  
52

#### 53 54 ***Phase 1***

55  
56 From October to November 2017, we performed a phase 1 assessment, a screening phase that  
57  
58 aimed to collect baseline data and identify people at high risk of aICAS. During this phase,  
59  
60

1  
2  
3  
4 all participants underwent a structured questionnaire survey, a transcranial Doppler (TCD)  
5  
6 examination, and a colour Doppler ultrasound examination (neck) on the same day.  
7  
8

9 *Face-to-face interviews.* A standardized questionnaire was used to collect data on  
10  
11 demographic features, health and family history (e.g., chronic diseases), CRFs (e.g.,  
12  
13 hypertension, diabetes, and obesity), lifestyle factors (e.g., diet habits, smoking, alcohol  
14  
15 consumption, tea consumption, and physical activity), menstrual and reproductive history,  
16  
17 quality of life, and current use of medication [18, 19]. Typically, the interview took  
18  
19 approximately 30 minutes. Then, all participants underwent physical and clinical  
20  
21 examinations, which included BP and anthropometric measurements, carotid artery B-mode  
22  
23 ultrasonography, and TCD examination.  
24  
25  
26  
27  
28

29 *BP and anthropometric measurements.* All measurements were performed by trained nurses.  
30  
31 After a 5-min rest, arterial blood pressure was measured twice at a 5-min interval using an  
32  
33 automated sphygmomanometer with the participant in the seated position. The mean value of  
34  
35 the two measurements was used in the analysis. Hypertension was defined as blood pressure  
36  
37  $\geq 140/90$  mmHg or use of antihypertensive drugs. Height was measured without shoes using a  
38  
39 standard right-angle device and a fixed measurement tape (to the nearest 0.5 cm). Body  
40  
41 weight without heavy clothing was measured. We defined obesity as a body mass  
42  
43 index (BMI)  $\geq 28$  kg/m<sup>2</sup> and overweight as a BMI of 24-27.9 kg/m<sup>2</sup>.  
44  
45  
46  
47  
48  
49

50 *TCD ultrasound examination.* Participants were examined with a portable machine (VIASYS  
51  
52 Companion III, Nicolet, Washington, United States) by two experienced physicians with  
53  
54 expertise in sonography after a 5-min rest in a quiet and comfortable room. The bilateral  
55  
56 MCA, anterior cerebral artery (ACA), posterior cerebral artery (PCA), vertebral artery (VA),  
57  
58  
59  
60

1  
2  
3  
4 and basilar artery (BA) were examined with a 2 MHz probe through a temporal window,  
5  
6 occipital window, and eye window, respectively. The depth, peak systolic velocity (PSV),  
7  
8 mean flow velocity (MFV), end diastolic velocity, and pulsatility index were measured for  
9  
10 each artery. The following MFV cut-offs were used for the diagnosis of  $\geq 50\%$  intracranial  
11  
12 stenosis of various arteries according to the criteria described in the Stroke Outcomes and  
13  
14 Neuroimaging of Intracranial Atherosclerosis (SONIA) trial[20]: MFV  $\geq 100$  cm/s for MCA  
15  
16 stenosis, MFV  $\geq 80$  cm/s for VA stenosis, and MFV  $\geq 80$  cm/s for BA stenosis. Because the  
17  
18 ACA and PCA were not evaluated in the SONIA trial, we followed previously validated  
19  
20 criteria to define  $\geq 50\%$  stenosis in these vessels[21]: MFV  $\geq 80$  cm/s and  $\geq 30\%$  different  
21  
22 when compared to the contralateral ACA segment for ACA stenosis and MFV  $\geq 80$  cm/s for  
23  
24 PCA stenosis. The criteria for  $\geq 70\%$  stenosis were as follows[22]: MCA: MFV  $\geq 120$  cm/s or  
25  
26 a stenotic/prestenotic ratio  $\geq 3$  or low velocity; VA and BA: MFV  $\geq 110$  cm/s or a  
27  
28 stenotic/prestenotic ratio  $\geq 3$ . In addition, the presence of turbulence or musical sounds and an  
29  
30 abnormal segmental velocity were considered for the diagnosis of stenosis.  
31  
32  
33  
34  
35  
36  
37  
38  
39

40 *Carotid ultrasonography examination.* Carotid ultrasound examination was performed in the  
41  
42 head-straight flat supine position by two experienced physicians to measure intimal medial  
43  
44 thickness (IMT), PSV, and EDV of the common carotid artery (CCA), internal carotid artery  
45  
46 (ICA), and external carotid artery (ECA) with a 7-MHz linear transducer (Siemens ACUSON  
47  
48 P500). First, the structure of the vascular wall of the full-length of the CCA and the  
49  
50 bifurcation and the initial segment of the ICA as well as atherosclerotic plaques and  
51  
52 intravascular echo were measured in a cross-section. Then, the IMT of the distal segment of  
53  
54 the CCA (1 to 1.5 cm below the bifurcation level), the internal diameter of the ICA, and the  
55  
56  
57  
58  
59  
60

1  
2  
3  
4 distal segment of the CCA were measured in longitudinal sections. The diameter was defined  
5  
6 as the vertical distance between the upper edge of the posterior wall of the vessel and the  
7  
8 inferior border of the anterior wall. When vessel stenosis occurred, the residual diameter and  
9  
10 original diameter were measured. The thickness of the IMT was defined as the vertical  
11  
12 distance between the upper edge of the posterior wall of the vessel and the upper edge of the  
13  
14 outer membrane. Location, morphology, and integrity of the fibrous cap and the acoustic  
15  
16 characteristics of the plaque were observed, and the size of the plaque was measured. Intimal  
17  
18 thickening was defined as intimal-middle film thickness  $\geq 1.0$  mm, and plaque was defined as  
19  
20 focal intimal-middle film thickness  $\geq 1.5$  mm[23].  
21  
22  
23  
24  
25

26  
27 *Laboratory tests.* After overnight fasting, participants came to the local clinic, and peripheral  
28  
29 venous blood samples were taken in the morning. The blood was then allowed to clot in a 37  
30  
31 °C water bath for 30 minutes before it was centrifuged at 3,000 rpm for 15 minutes. Then, the  
32  
33 serum supernatant was collected and separated into five aliquots (200  $\mu$ L per aliquot) and  
34  
35 immediately stored in liquid nitrogen. Blood tests were conducted at the certified clinical  
36  
37 laboratory of the Shandong Provincial Hospital Affiliated to Shandong University. We  
38  
39 measured a complete blood count in the whole blood as well as serum fasting blood glucose  
40  
41 (FBG), liver function, renal function, high-density lipoprotein-cholesterol (HDL-C), low-  
42  
43 density lipoprotein-cholesterol (LDL-C), triglyceride, apolipoprotein genotyping,  
44  
45 homocysteine, supersensitivity C-reactive protein, and insulin. The remaining serum samples  
46  
47 were stored at -80 °C until further analyses. Diabetes was defined as FBG  $\geq 7.0$  mmol/l or  
48  
49 current use of blood glucose-lowering agents or insulin injection. High cholesterol was defined  
50  
51 as total cholesterol  $\geq 6.20$  mmol/l or current use of hypolipidaemic drugs, and dyslipidaemia  
52  
53  
54  
55  
56  
57  
58  
59  
60

1  
2  
3  
4 was defined as total cholesterol  $\geq 6.20$  mmol/l, triglycerides  $\geq 1.8$  mmol/l, HDL-C  $< 1.11$  mmol/l  
5  
6 or LDL-C  $\geq 3.36$  mmol/l or current use of hypolipidaemic drugs.  
7

## 8 9 *Phase 2*

10  
11 From April to October 2018, participants who were screened positive, and a group of age-  
12  
13 and sex-matched controls (1:1) who were screened negative for ICAS by TCD in Phase 1,  
14  
15 underwent Phase 2 assessment the day in our hospital, which included neuropsychological  
16  
17 assessments, structural brain MRI scans, and MRA.  
18  
19

20  
21  
22 *MRI protocol and acquisition.* All invited participants underwent brain MRI scans on a 3.0T  
23  
24 scanner (Achieve; Philips Medical Systems, Best, The Netherlands) with an 8-channel head  
25  
26 coil. The core MRI protocol included MRA, dynamic susceptibility contrast-enhanced  
27  
28 perfusion-weighted imaging (DSC-PWI), diffusion tensor imaging (DTI), T1-weighted  
29  
30 imaging with 3D variable refocusing flip angle volume isotropic turbo spin-echo acquisition  
31  
32 (3D T1VISTA), 3D T2VISTA, fluid-attenuated inversion recovery images, and contrast-  
33  
34 enhanced T1VISTA. The post-enhanced T1VISTA parameters were the same as those used  
35  
36 for pre-T1VISTA. A gadolinium contrast medium (Gd-DTPA, Magnevist, Beijing BeiLu  
37  
38 Pharmaceutical Co., Ltd., Beijing, China) was intravenously injected at the third acquisition  
39  
40 (0.2 mL/kg or 4.5 mL/s followed immediately by a 30 mL physiological saline flush). The  
41  
42 extent of stenosis in the five evaluated arteries (bilateral MCA, bilateral intracranial ICA, and  
43  
44 BA) was classified into five grades by consensus as normal, mild (signal reduction  $< 50\%$ ),  
45  
46 moderate (signal reduction  $\geq 50\%$  and  $< 70\%$ ), severe (signal reduction  $\geq 70\%$ ), or occlusion  
47  
48 (focal signal loss with the presence of distal signal). The diagnosis and grading of stenosis  
49  
50 was performed by a neurologist specializing in stroke and a clinical neuroradiologist.  
51  
52  
53  
54  
55  
56  
57  
58  
59  
60

1  
2  
3  
4 *Neuropsychological evaluation.* Neuropsychological assessments were performed by  
5  
6 experienced neuropsychologists trained specifically for this project and included tests of  
7  
8 global cognitive function and specific cognitive domains, such as memory, executive  
9  
10 function, attention, visuospatial function, and mood. The Chinese versions of the Mini-  
11  
12 Mental State Examination (MMSE) and the Montreal Cognitive Assessment (MoCA) were  
13  
14 performed to assess global cognitive function[24]. Specific cognitive domains (e.g., episodic  
15  
16 memory, verbal fluency, attention, and executive function) were assessed using the following  
17  
18 neuropsychological tests: (1) the Rey Auditory Verbal Learning Test Learning (RAVLT:  
19  
20 direct recall, delayed recall, and word list recognition) for episodic memory[25], the Fuld-  
21  
22 object Memory Evaluation (FOM) for object memory[26], (2) the Category Verbal Fluency  
23  
24 test (CVF) for verbal performance and executive function[27], (3) the Trail Making Test  
25  
26 (TMT A&B) for executive function[28], (4) the Wechsler Memory Scale-III Forward Digit  
27  
28 Span (FDS) and Backward Digit Span(BDS) for attention and executive function[29], and (5)  
29  
30 the Wechsler block design test and Clock Drawing Test (CDT) for visuospatial and motor  
31  
32 skills[30]. In addition, depressive symptoms were assessed using the Hamilton depression  
33  
34 Scale (HAMD) [31]. The Barthel index was used to assess basic activities of daily living  
35  
36 (ADL) [32].

37  
38  
39  
40  
41  
42  
43  
44  
45  
46  
47  
48 *Quality control procedure.* Before the beginning of the study, all staff were centrally trained  
49  
50 and required to demonstrate competency to perform different assessments, including  
51  
52 interviews, biospecimen acquisition, cerebrovascular assessments, and cognitive testing.  
53  
54 Psychologists, neuroradiologists, and neurologists attended a standardization meeting to  
55  
56 ensure the consistency of application of the evaluation criteria. The collection and processing  
57  
58  
59  
60

1  
2  
3  
4 of the data were checked and verified by two or even three people, and the entry of the  
5  
6 collected data was completed via integral double entry.  
7

### 8 9 ***Statistical Analysis***

10  
11 The data are presented as frequencies (%) for categorical variables and as the mean (SD) or  
12  
13 median (interquartile range, IQR) for continuous variables. Characteristics of the study  
14  
15 participants by sex were compared using the general linear regression model for continuous  
16  
17 variables and chi-square test for categorical variables. We describe the distribution of major  
18  
19 CRFs and aICAS. We used the statistical packages R (<http://www.r-project.org>; version  
20  
21 3.4.3) and EmpowerStats ([www.empowerstats.com](http://www.empowerstats.com); X&Y Solutions Inc.) for all analyses.  
22  
23  
24  
25

### 26 27 ***Follow-up assessments***

28  
29 All survivors of the baseline participants will be invited to undertake a follow-up evaluation  
30  
31 in the third year. The same questionnaire used for the baseline survey will be used during the  
32  
33 follow-up examination for collecting epidemiological, neuropsychological, and clinical data.  
34  
35 Analysis of biomarkers as well as TCD test, carotid ultrasonography examination, and brain  
36  
37 MRI scan will also be performed.  
38  
39  
40  
41  
42  
43  
44  
45

### 46 47 ***Patient and public involvement***

48  
49 No patients or public were involved in the development of research questions and the design  
50  
51 of the project. Cardiovascular risk factors and stenosed arteries would be screened out during  
52  
53 the project. Thus, primary and secondary prevention of stroke will surely benefit from this  
54  
55 project. Furthermore, in the future patients may benefit from the knowledge generated from  
56  
57 this project once it becomes publicly available.  
58  
59  
60

## Findings to date

In this ongoing prospective cohort study of middle-aged and older adults who were free of clinical stroke, we have demonstrated the feasibility of a two-phase procedure to study the epidemiology and nature history of aICAS in rural communities by integrating epidemiological approaches with clinical, neuroimaging, and neuropsychological techniques.

The characteristics of baseline participants in KT-aICAS are reported in [table 1](#). The mean age of the 2311 participants was 57.6 years, and 53.4% were women. Compared with men, women were older, less educated, and less likely to be single, and had higher levels of total cholesterol, triglycerides, LDL-C, and BMI, but lower levels of diastolic pressure and HDL-C. There was no significant sex difference in levels of FBG or systolic pressure and prevalence of hypertension. Men were much more likely to smoke and consume alcohol than women across all age groups, whereas women had a higher prevalence of diabetes, obesity and a higher cholesterol level than men mainly in groups over 60 years of age ([figure 2](#)). The sociocultural tradition in China, especially in rural regions, could explain the sex differences in behavioural factors, whereas the differences in health conditions might be partially contributable to sex differences in factors such as educational achievement, socioeconomic position, lifestyles, and dietary habits. Taken together, our data showed that major CRFs were highly prevalent in rural-dwelling middle-aged and elderly people in China and that there were substantial sex differences in certain lifestyle factors. We have reported that these CRFs, especially when coexisting, are strongly correlated with aICAS [33]. The potential cognitive consequence of CRFs and aICAS including the characteristics of vessel plaque



1  
2  
3  
4 image evaluated by 3T MRI will be analysed in a future study. Therefore, given the well-  
5  
6 established aetiological relationship of CRFs with atherosclerosis and clinical stroke, our  
7  
8 study suggests that active interventions to target these modifiable risk factors are urgently  
9  
10 needed to counteract the huge burden of stroke and dementia in rural areas of China.  
11  
12  
13

14 Of the 2311 participants, 2027 (87.7%) completed the diagnostic procedure for aICAS.  
15  
16 Out of the 2027 participants, 437 (21.5%) participants have poor temporal window, and 154  
17  
18 persons (92 women and 62 men) were diagnosed with aICAS, which corresponded to the  
19  
20 overall prevalence of 7.6% (8.7% in women vs. 6.4% in men,  $P=0.055$ ). The overall  
21  
22 prevalence of aICAS increased with advancing age, from 5.1% in individuals aged 40-49  
23  
24 years to 12.7% in those aged  $\geq 70$  years (figure 3). There was a sex difference in the patterns  
25  
26 of age-specific prevalence of aICAS, such that the prevalence increased steadily with age in  
27  
28 men, but in women the prevalence was relatively stable from 40 to 60 years of age, and then  
29  
30 substantially increase. The reasons for the sex differences is not fully understood, but the fast  
31  
32 increase in the prevalence of aICAS with age after 60 years of age might be partially due to a  
33  
34 decrease in estrogen levels among postmenopausal women [34].  
35  
36  
37  
38  
39  
40  
41  
42

43 A total of 305 intracranial arteries were diagnosed with aICAS; 221 (72.5%) were  
44  
45 involved in ACA, MCA or ICA, and 84 (27.5%) were involved in PCA, VA or BA (table 2).  
46  
47 The distributions of aICAS by regional arteries were as follows: ACA, 55 (18.0%) arteries;  
48  
49 MCA, 95 (31.1%) arteries; ICA, 71 (23.3%) arteries; PCA, 38 (12.5%) arteries; VA, 25  
50  
51 (8.2%) arteries; BA, 21 (6.9%) arteries. The arteries in the anterior circulation were more  
52  
53 frequently involved than arteries in the posterior circulation.  
54  
55  
56  
57  
58  
59  
60

1  
2  
3  
4 Most previous studies have used either TCD or MRA alone to diagnose aICAS, and  
5  
6 different detection approaches and procedures may contribute to the substantial variations in  
7  
8 the reported prevalence of aICAS. For example, the prevalence of aICAS was reported to be  
9  
10 13.2% among coal mine workers aged  $\geq 40$  years in a study that used only TCD to detect  
11  
12 aICAS, whereas another study of people aged  $\geq 40$  years (mean age, 58.1 years) from Korea  
13  
14 reported that the prevalence of aICAS was 24.5% in all intracranial vessels[7]. We used a  
15  
16 two-phase approach that included a screening phase with TCD examination followed by a  
17  
18 diagnostic phase with MRA, and we found that the overall prevalence of aICAS was 7.6% in  
19  
20 this rural-dwelling middle-aged and elderly population. TCD examination, when used as a  
21  
22 tool for detecting arterial stenosis, has the advantage of convenience and non-invasiveness  
23  
24 but also has a high negative predictive value ( $\sim 90\%$ ); thus, TCD is suitable for screening  
25  
26 arterial stenosis in a large-scale population study. However, the positive predictive value of  
27  
28 TCD examination is only  $\sim 50\%$ . In contrast, MRA provides a good positive predictive value  
29  
30 for ICAS but may not be suitable for large-scale community-based studies due to its high  
31  
32 costs and inconvenience[20]. In this study, we combined TCD with MRA to detect aICAS,  
33  
34 which is feasible especially among people who are living in the remote rural communities.  
35  
36 This approach will allow us to obtain a more accurate estimate of aICAS prevalence than that  
37  
38 was achieved in previous studies used either TCD or MRA alone.  
39  
40  
41  
42  
43  
44  
45  
46  
47  
48  
49

50 We also found that the distribution of aICAS was more common in the anterior  
51  
52 circulation than in the posterior circulation, in accordance with a study from Japan[35]. The  
53  
54 variations in the regional arterial distribution of aICAS are likely due to differences in the  
55  
56 anatomical and haemodynamic characteristics between the anterior and posterior circulation.  
57  
58  
59  
60

1  
2  
3  
4 For example, in the anterior circulation, the higher number of vascular branches may increase  
5  
6 the risk of atherosclerosis[36]. In addition, TCD has relatively low sensitivity in detecting  
7  
8 posterior circulation stenosis[37], and this may have contributed, in part, to the differences  
9  
10 observed in the regional arterial distribution of aICAS.  
11  
12  
13

14 In summary, in the community-based KT-aICAS study, aICAS affected nearly one-tenth  
15  
16 of the rural-dwelling middle-aged and elderly residents, and its prevalence increased with  
17  
18 advanced age. Anterior circulation arteries were most vulnerable to atherosclerotic lesions. In  
19  
20 addition, major CRFs were highly prevalent among middle-aged and elderly rural dwellers  
21  
22 who were free of stroke. These findings may have important implications for the primary  
23  
24 prevention of aICAS, clinical stroke, and cognitive impairment. Future follow-up data from  
25  
26 this cohort may contribute to the understanding of the epidemiology and natural history as  
27  
28 well as cognitive consequences of aICAS among rural residents in China.  
29  
30  
31  
32  
33  
34  
35  
36  
37

### 38 **Strengths and Limitations**

39  
40 This cohort study targeted residents living in rural communities in China, to whom the  
41  
42 research community has so far paid little attention. Second, we integrated TCD and MRA  
43  
44 into a two-phase procedure to detect aICAS in a large-scale population study, and this  
45  
46 approach is likely to allow us to obtain a relatively accurate estimate of the prevalence of  
47  
48 aICAS. Furthermore, high-resolution MRI scans could help further evaluate the  
49  
50 characteristics of arterial stenosis and avoid the contamination of ICAS cases with cases  
51  
52 involving other non-atherosclerotic diseases[38]. In addition, high-resolution MRI can be  
53  
54 used to detect intraplaque haemorrhage, lipid cores, and artery fibrous caps, thus providing  
55  
56  
57  
58  
59  
60

1  
2  
3  
4 further insight into the long-term prognosis of aICAS. To the best of our knowledge, this is  
5  
6 the first community-based study of aICAS among an Asian population that used high-  
7  
8 resolution MRI as well as PWI images and DTI images. Finally, this community-based study  
9  
10 includes comprehensive neuropsychological assessments that covers global cognitive  
11  
12 function (MMSE and MoCA) and multiple cognitive domains (e.g., memory, verbal fluency,  
13  
14 attention, and executive function), and thus, will facilitate future exploration of specific  
15  
16 cognitive profiles associated with aICAS and its progression.  
17  
18  
19  
20  
21

22 Our study also has limitations. First, we used TCD as a screening tool for arterial  
23  
24 stenosis, which might have missed some cases of aICAS, and thus, have underestimated the  
25  
26 overall prevalence of aICAS. Furthermore, in case of a poor or incomplete echo window for  
27  
28 TCD, people without any stenosis in the VA, BA, and ACA were considered to be non-  
29  
30 stenotic. This might also have resulted in the underestimation of the true prevalence of aICAS  
31  
32 in this population. Finally, our study sample was selected from only one rural area, and this  
33  
34 should be kept in mind when generalizing our findings to other rural populations.  
35  
36  
37  
38  
39  
40  
41  
42

43 **Acknowledgements** We would like to thank all the study participants, the staff of the  
44  
45 participating hospitals, and the Steering Committee Members of the Kongcun Town Study.  
46  
47

48 **Author Contributions** QS, FX, and YD conceived the research question and designed  
49  
50 the study. XW and FX conducted the statistical analysis. XW, CQ, and QS wrote the first and  
51  
52 subsequent drafts of the manuscript. XJ, SwS, SS, YZ, PY, SL, JL, GW, and ML contributed  
53  
54 to the epidemiological investigation. All authors contributed to data interpretation and critical  
55  
56 revisions of the manuscript, and approved the final version of the submitted manuscript.  
57  
58  
59  
60

1  
2  
3  
4       **Funding** This Study was supported by the grants from Jinan Science and Technology  
5  
6 Bureau (201704101), Department of Science and Technology of Shandong Province  
7  
8 (2014GSF118106, 2016GSF201062, and ZR2017MH114), the National Nature Science  
9  
10 Foundation of China (8171101298, 81971128), and the China Ministry of Sciences and  
11  
12 Technology (2017YFC1310100 and 2017YFC0907003). C Qiu received grants from the  
13  
14 Swedish Research Council for the Sino-Sweden Network for Aging Research (2017-00740)  
15  
16 and the Sino-Sweden Joint Research Project (2017-05819), Sweden and the Taishan Oversea  
17  
18 Scholar Program of Shandong Province, China.  
19  
20  
21  
22

23  
24       **Competing interests** None declared.

25  
26       **Participant consent** Obtained.

27  
28       **Ethics approval** Shandong Provincial Hospital Affiliated to Shandong University in  
29  
30 Jinan, Shandong, China (2017566).  
31  
32

33  
34       **Provenance and peer review** Not commissioned; externally peer reviewed.

35  
36       **Data sharing statement** Data are available upon reasonable request. Collaboration is  
37  
38 welcomed and data sharing can be agreed upon. The corresponding author can be contacted  
39  
40 (sqj1210@163.com).  
41  
42

43  
44       **Open Access** This is an Open Access article distributed in accordance with the Creative  
45  
46 Commons Attribution Non Commercial (CC BY-NC 4.0) license, which permits others to  
47  
48 distribute, remix, adapt, build upon this work non-commercially, and license their derivative  
49  
50 works on different terms, provided the original work is properly cited and the use is non-  
51  
52 commercial.  
53  
54  
55  
56  
57  
58  
59  
60

## References

1. Bos D, Portegies ML, van der Lugt A, Bos MJ, Koudstaal PJ, Hofman A, Krestin GP, Franco OH, Vernooij MW, Ikram MA: **Intracranial carotid artery atherosclerosis and the risk of stroke in whites: the Rotterdam Study.** *JAMA Neurol* 2014, **71**(4):405-411.
2. Beach TG, Wilson JR, Sue LI, Newell A, Poston M, Cisneros R, Pandya Y, Esh C, Connor DJ, Sabbagh M *et al*: **Circle of Willis atherosclerosis: association with Alzheimer's disease, neuritic plaques and neurofibrillary tangles.** *Acta Neuropathol* 2007, **113**(1):13-21.
3. Battistella V, Elkind M: **Intracranial atherosclerotic disease.** *Eur J Neurol* 2014, **21**(7):956-962.
4. Parfenov VA, Ostroumova OD, Ostroumova TM, Kochetkov AI, Fateeva VV, Khacheva KK, Khakimova GR, Epstein OI: **Vascular cognitive impairment: pathophysiological mechanisms, insights into structural basis, and perspectives in specific treatments.** *Neuropsychiatr Dis Treat* 2019, **15**:1381-1402.
5. Lopez-Cancio E, Dorado L, Millan M, Reverte S, Sunol A, Massuet A, Galan A, Alzamora MT, Pera G, Toran P *et al*: **The Barcelona-Asymptomatic Intracranial Atherosclerosis (AsIA) study: prevalence and risk factors.** *Atherosclerosis* 2012, **221**(1):221-225.
6. Suri MF, Qiao Y, Ma X, Guallar E, Zhou J, Zhang Y, Liu L, Chu H, Qureshi AI, Alonso A *et al*: **Prevalence of Intracranial Atherosclerotic Stenosis Using High-Resolution Magnetic Resonance Angiography in the General Population: The Atherosclerosis Risk in Communities Study.** *Stroke* 2016, **47**(5):1187-1193.
7. Bae HJ, Lee J, Park JM, Kwon O, Koo JS, Kim BK, Pandey DK: **Risk factors of intracranial cerebral atherosclerosis among asymptomatics.** *Cerebrovasc Dis* 2007, **24**(4):355-360.
8. Wang A, Li Z, Luo Y, Liu X, Guo X, Wu S, Zhao X, Jonas JB: **Asymptomatic intracranial arterial stenosis and metabolic syndrome: the APAC study.** *PLoS One* 2014, **9**(12):e113205.
9. Wong KS, Ng PW, Tang A, Liu R, Yeung V, Tomlinson B: **Prevalence of asymptomatic intracranial atherosclerosis in high-risk patients.** *Neurology* 2007, **68**(23):2035-2038.
10. Huang HW, Guo MH, Lin RJ, Chen YL, Luo Q, Zhang Y, Wong KS: **Prevalence and risk factors of middle cerebral artery stenosis in asymptomatic residents in Rongqi County, Guangdong.** *Cerebrovasc Dis* 2007, **24**(1):111-115.
11. Arenillas JF, Lopez-Cancio E, Wong KS: **Biomarkers, Natural Course and Prognosis.** *Frontiers of neurology and neuroscience* 2016, **40**:93-108.
12. Song A, Liang Y, Yan Z, Sun B, Cai C, Jiang H, Qiu C: **Highly prevalent and poorly controlled cardiovascular risk factors among Chinese elderly people living in the rural community.** *Eur J Prev Cardiol* 2014, **21**(10):1267-1274.
13. Nahab F, Cotsonis G, Lynn M, Feldmann E, Chaturvedi S, Hemphill JC, Zweifler R, Johnston K, Bonovich D, Kasner S *et al*: **Prevalence and prognosis of coexistent asymptomatic intracranial stenosis.** *Stroke* 2008, **39**(3):1039-1041.
14. Ni J, Yao M, Gao S, Cui LY: **Stroke risk and prognostic factors of asymptomatic middle cerebral artery atherosclerotic stenosis.** *J Neurol Sci* 2011, **301**(1-2):63-65.
15. Lou X, Ma X, Liebeskind DS, Ma N, Tian C, Lyu J, Long X, Ma L, Wang DJ: **Collateral perfusion using arterial spin labeling in symptomatic versus asymptomatic middle cerebral artery stenosis.** *J Cereb Blood Flow Metab* 2019, **39**(1):108-117.
16. Matsui R, Nakagawa T, Takayoshi H, Onoda K, Oguro H, Nagai A, Yamaguchi S: **A Prospective Study of Asymptomatic Intracranial Atherosclerotic Stenosis in Neurologically Normal Volunteers in a Japanese Cohort.** *Front Neurol* 2016, **7**:39.

- 1
- 2
- 3
- 4 17. Meng Y, Yu K, Zhang L, Liu Y: **Cognitive Decline in Asymptomatic Middle Cerebral Artery Stenosis Patients with Moderate and Poor Collaterals: A 2-Year Follow-Up Study.** *Med Sci Monit* 2019, **25**:4051-4058.
- 5
- 6
- 7 18. Kowal P, Chatterji S, Naidoo N, Biritwum R, Fan W, Lopez Ridaura R, Maximova T, Arokiasamy P, Phaswana-Mafuya N, Williams S *et al*: **Data resource profile: the World Health Organization Study on global AGEing and adult health (SAGE).** *International journal of epidemiology* 2012, **41**(6):1639-1649.
- 8
- 9
- 10
- 11
- 12 19. Organization WH: **The WHO STEPwise approach to noncommunicable disease risk factor surveillance (STEPS).** 20 Avenue Appia, 1211 Geneva 27.
- 13
- 14 20. Feldmann E, Wilterdink JL, Kosinski A, Lynn M, Chimowitz MI, Sarafin J, Smith HH, Nichols F, Rogg J, Cloft HJ *et al*: **The Stroke Outcomes and Neuroimaging of Intracranial Atherosclerosis (SONIA) trial.** *Neurology* 2007, **68**(24):2099-2106.
- 15
- 16 21. Tsivgoulis G, Sharma VK, Hoover SL, Lao AY, Ardelt AA, Malkoff MD, Alexandrov AV: **Applications and advantages of power motion-mode Doppler in acute posterior circulation cerebral ischemia.** *Stroke* 2008, **39**(4):1197-1204.
- 17
- 18 22. Zhao L, Barlinn K, Sharma VK, Tsivgoulis G, Cava LF, Vasdekis SN, Teoh HL, Triantafyllou N, Chan BP, Sharma A *et al*: **Velocity criteria for intracranial stenosis revisited: an international multicenter study of transcranial Doppler and digital subtraction angiography.** *Stroke* 2011, **42**(12):3429-3434.
- 19
- 20 23. Mozzini C, Roscia G, Casadei A, Cominacini L: **Searching the perfect ultrasonic classification in assessing carotid artery stenosis: comparison and remarks upon the existing ultrasound criteria.** *J Ultrasound* 2016, **19**(2):83-90.
- 21
- 22 24. Hu JB, Zhou WH, Hu SH, Huang ML, Wei N, Qi HL, Huang JW, Xu Y: **Cross-cultural difference and validation of the Chinese version of Montreal Cognitive Assessment in older adults residing in Eastern China: preliminary findings.** *Arch Gerontol Geriatr* 2013, **56**(1):38-43.
- 23
- 24 25. Brugnolo A, Morbelli S, Arnaldi D, De Carli F, Accardo J, Bossert I, Dessi B, Fama F, Ferrara M, Girtler N *et al*: **Metabolic correlates of Rey auditory verbal learning test in elderly subjects with memory complaints.** *J Alzheimers Dis* 2014, **39**(1):103-113.
- 25
- 26 26. Anderson-Hanley C, Miele AS, Dunnam M: **The fuld object-memory evaluation: development and validation of an alternate form.** *Appl Neuropsychol Adult* 2013, **20**(1):1-6.
- 27
- 28 27. Whiteside DM, Kealey T, Semla M, Luu H, Rice L, Basso MR, Roper B: **Verbal Fluency: Language or Executive Function Measure?** *Appl Neuropsychol Adult* 2016, **23**(1):29-34.
- 29
- 30 28. Misdraji EL, Gass CS: **The Trail Making Test and its neurobehavioral components.** *J Clin Exp Neuropsychol* 2010, **32**(2):159-163.
- 31
- 32 29. Giofre D, Stoppa E, Ferioli P, Pezzuti L, Cornoldi C: **Forward and backward digit span difficulties in children with specific learning disorder.** *J Clin Exp Neuropsychol* 2016, **38**(4):478-486.
- 33
- 34 30. Sands LP, Terry H, Meredith W: **Change and stability in adult intellectual functioning assessed by Wechsler item responses.** *Psychol Aging* 1989, **4**(1):79-87.
- 35
- 36 31. Worboys M: **The Hamilton Rating Scale for Depression: The making of a "gold standard" and the unmaking of a chronic illness, 1960-1980.** *Chronic Illn* 2013, **9**(3):202-219.
- 37
- 38 32. Mlinac ME, Feng MC: **Assessment of Activities of Daily Living, Self-Care, and Independence.** *Archives of clinical neuropsychology : the official journal of the National Academy of Neuropsychologists* 2016, **31**(6):506-516.
- 39
- 40 33. Sun Q, Wang Q, Wang X, Ji X, Sang S, Shao S, Zhao Y, Xiang Y, Xue Y, Li J *et al*: **Prevalence and cardiovascular risk factors of asymptomatic intracranial arterial stenosis: the Kongcun Town**
- 41
- 42
- 43
- 44
- 45
- 46
- 47
- 48
- 49
- 50
- 51
- 52
- 53
- 54
- 55
- 56
- 57
- 58
- 59
- 60

- 1  
2  
3  
4  
5  
6  
7  
8  
9  
10  
11  
12  
13  
14  
15  
16  
17  
18  
19  
20  
21  
22  
23  
24  
25  
26  
27  
28  
29  
30  
31  
32  
33  
34  
35  
36  
37  
38  
39  
40  
41  
42  
43  
44  
45  
46  
47  
48  
49  
50  
51  
52  
53  
54  
55  
56  
57  
58  
59  
60
- Study in Shandong, China.** *European journal of neurology* 2019.
34. Khalil RA: **Estrogen, vascular estrogen receptor and hormone therapy in postmenopausal vascular disease.** *Biochemical pharmacology* 2013, **86**(12):1627-1642.
35. Uehara T, Tabuchi M, Mori E: **Frequency and clinical correlates of occlusive lesions of cerebral arteries in Japanese patients without stroke. Evaluation by MR angiography.** *Cerebrovasc Dis* 1998, **8**(5):267-272.
36. Arkuszewski M, Swiat M, Hurst RW, Weigele JB, Al-Okaili RN, Kasner SE, Melhem ER, Krejza J: **Vertebral and Basilar Arteries: Transcranial Color-Coded Duplex Ultrasonography versus Conventional TCD in Detection of Narrowings.** *Neuroradiol J* 2012, **25**(5):509-514.
37. Xu WH, Li ML, Gao S, Ni J, Zhou LX, Yao M, Peng B, Feng F, Jin ZY, Cui LY: **Plaque distribution of stenotic middle cerebral artery and its clinical relevance.** *Stroke* 2011, **42**(10):2957-2959.
38. Jung SC, Kang DW, Turan TN: **Vessel and Vessel Wall Imaging.** *Frontiers of neurology and neuroscience* 2016, **40**:109-123.



**Table 1.** Characteristics of the study participants by gender

| Characteristics <sup>b</sup>                                  | Total<br>(n=2311) | Men<br>(n=1076) | Women<br>(n=1235) | P Value <sup>a</sup> |
|---------------------------------------------------------------|-------------------|-----------------|-------------------|----------------------|
| Age (years), mean (SD)                                        | 57.6(10.5)        | 56.3(10.3)      | 58.8(10.5)        | <0.001               |
| Age group (years), n(%)                                       |                   |                 |                   | <0.001               |
| 40-49                                                         | 613(26.6)         | 353(32.9)       | 260(21.1)         |                      |
| 50-59                                                         | 733(31.8)         | 334(31.1)       | 399(32.4)         |                      |
| 60-69                                                         | 607(26.3)         | 240(22.3)       | 367(29.8)         |                      |
| ≥70                                                           | 352(15.3)         | 147(13.7)       | 205(16.7)         |                      |
| Marital status <sup>b</sup> , n (%)                           |                   |                 |                   | <0.001               |
| Single                                                        | 252(10.9)         | 72(6.7)         | 180(14.6)         |                      |
| Married                                                       | 2058(89.1)        | 1003(93.3)      | 1055(85.4)        |                      |
| Educational level <sup>b</sup> , n (%)                        |                   |                 |                   | <0.001               |
| Illiterate                                                    | 354(15.3)         | 36(3.3)         | 318(25.8)         |                      |
| Elementary                                                    | 679(29.4)         | 247(23.0)       | 432(35.0)         |                      |
| Middle school                                                 | 976(42.3)         | 582(54.1)       | 394(31.9)         |                      |
| High school and above                                         | 301(13.0)         | 211(19.6)       | 90(7.3)           |                      |
| Body mass index (kg/m <sup>2</sup> ) <sup>b</sup> , mean (SD) | 25.2(3.8)         | 24.8(3.2)       | 25.5(4.1)         | <0.001               |
| Systolic pressure (mm Hg) <sup>b</sup> , mean (SD)            | 145.0(22.4)       | 144.5(21.3)     | 145.4(23.4)       | 0.365                |
| Diastolic pressure (mm Hg) <sup>b</sup> , mean (SD)           | 88.3(12.7)        | 89.9(13.0)      | 86.9(12.2)        | <0.001               |
| Fasting blood glucose (mmol/l) <sup>b</sup> , mean (SD)       | 6.1(1.8)          | 6.0(1.8)        | 6.1(1.9)          | 0.084                |
| LDL-C (mmol/l) <sup>b</sup> , mean (SD)                       | 3.0(0.7)          | 2.9(0.7)        | 3.1(0.7)          | <0.001               |
| HDL-C (mmol/l) <sup>b</sup> , mean (SD)                       | 1.6(0.4)          | 1.6(0.4)        | 1.6(0.3)          | 0.031                |
| Triglycerides (mmol/l) <sup>b</sup> , mean (SD)               | 1.4(0.9)          | 1.3(0.9)        | 1.5(0.9)          | <0.001               |
| Total cholesterol (mmol/l) <sup>b</sup> , mean (SD)           | 5.4(1.0)          | 5.2(0.9)        | 5.5(1.0)          | <0.001               |
| Dyslipidemia <sup>b</sup> , n (%)                             | 922(41.7)         | 378(36.2)       | 544(46.7)         | <0.001               |
| Smoking <sup>b</sup> , n (%)                                  | 504(21.9)         | 489(45.6)       | 15(1.2)           | <0.001               |
| Alcohol consumption <sup>b</sup> , n (%)                      | 727(31.5)         | 672(62.5)       | 55(4.5)           | <0.001               |
| Obesity <sup>b</sup> , n (%)                                  | 437(19.2)         | 165(15.5)       | 272(22.5)         | <0.001               |
| Hypertension <sup>b</sup> , n (%)                             | 1294(56.6)        | 592(55.3)       | 702(57.8)         | 0.220                |

|                                       |           |           |           |       |
|---------------------------------------|-----------|-----------|-----------|-------|
| Diabetes <sup>b</sup> , n (%)         | 725(32.9) | 319(30.5) | 406(34.9) | 0.028 |
| Carotid stenosis <sup>b</sup> , n (%) | 59(2.9)   | 33(3.4)   | 26(2.5)   | 0.202 |
| aICAS <sup>b</sup> , n (%)            | 154(7.6)  | 62(6.4)   | 92(8.6)   | 0.055 |
| MMSE score <sup>c</sup> , mean (SD)   | 23.4(5.4) | 24.7(4.4) | 22.5(5.9) | 0.001 |
| MoCA score <sup>c</sup> , mean (SD)   | 17.9(5.3) | 18.6(4.8) | 17.5(5.6) | 0.088 |

HDL-C: high-density lipoprotein cholesterol; LDL-C: low-density lipoprotein cholesterol; aICAS: asymptomatic intracranial artery stenosis; MMSE: Mini-Mental State Examination; MoCA: Montreal Cognitive Assessment.

<sup>a</sup>P values are for the test of differences between male and female.

<sup>b</sup>The number of participants with missing value were one for marital status and educational level, 38 for body mass index and obese status, 29 for blood pressure, 175 for fasting blood glucose, 106 for lipid measurements (LDL-C, HDL-C, triglycerides, and total cholesterol), eight for smoking, two for alcohol consumption, 102 for dyslipidemia, 26 for hypertension, 104 for diabetes, 284 for carotid stenosis, and 284 for aICAS (of the 2311 participants, 2027 completed the diagnostic procedure for aICAS).

<sup>c</sup>MMSE and MoCA tests were performed in 308 participants, including 154 with aICAS and 153 age- and sex-matched controls.

**Table 2.** Arterial distribution of asymptomatic intracranial atherosclerotic stenosis (aICAS) according to severity of stenosis (Total number of arteries with aICAS = 305)

| Arteries | Severity of intracranial arterial stenosis, n (%) |          |          |           |          |
|----------|---------------------------------------------------|----------|----------|-----------|----------|
|          | Mild                                              | Moderate | Severe   | Occlusion | Total    |
| ICA      | 28 (9.2)                                          | 20 (6.6) | 17 (5.6) | 6 (2.0)   | 71(23.3) |
| MCA      | 45 (14.8)                                         | 21 (6.9) | 23 (7.6) | 6 (2.0)   | 95(31.2) |
| ACA      | 22 (7.2)                                          | 17 (5.6) | 16 (5.3) | 0 (0.0)   | 55(18.0) |
| PCA      | 10 (3.3)                                          | 9 (3.0)  | 18 (5.9) | 1 (0.3)   | 38(12.5) |
| VA       | 4 (1.3)                                           | 2 (0.7)  | 8 (2.6)  | 11 (3.3)  | 25(8.2)  |
| BA       | 13 (4.3)                                          | 3 (1.0)  | 5 (1.6)  | 0 (0.0)   | 21(6.9)  |

MCA, middle cerebral artery; ACA, anterior cerebral artery; ICA, intracranial internal carotid artery; PCA, posterior cerebral artery; VA, vertebral artery; BA, basilar artery.

1  
2  
3 **Figure Legends**  
4

5  
6 **Figure 1** Flowchart of the study  
7

8 **Figure 2** Age- and gender-specific prevalence (per 100 population) of cardiovascular risk  
9 factors  
10

11  
12 **Figure 3** Age- and gender-specific prevalence (per 100 population) of aICAS  
13  
14  
15  
16  
17  
18  
19  
20  
21  
22  
23  
24  
25  
26  
27  
28  
29  
30  
31  
32  
33  
34  
35  
36  
37  
38  
39  
40  
41  
42  
43  
44  
45  
46  
47  
48  
49  
50  
51  
52  
53  
54  
55  
56  
57  
58  
59  
60

For peer review only

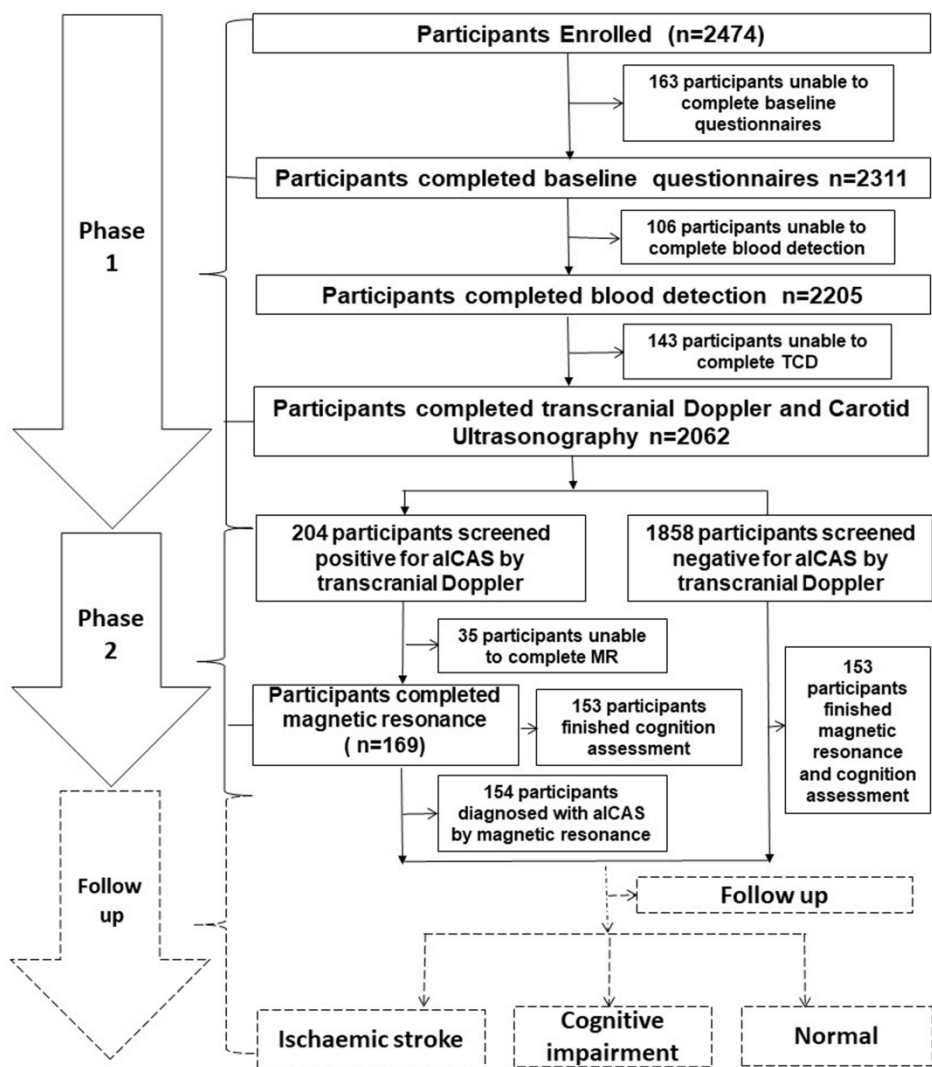

Figure 1 Flowchart of the study

236x263mm (300 x 300 DPI)



Figure 2 Age- and gender-specific prevalence (per 100 population) of cardiovascular risk factors

101x145mm (300 x 300 DPI)



all: P for trend<0.001; Men: P for trend<0.001; Women: P for trend =0.140

Figure 3 Age- and gender-specific prevalence (per 100 population) of aICAS

78x56mm (300 x 300 DPI)

# BMJ Open

## Cohort profile: the Kongcun Town Asymptomatic Intracranial Artery Stenosis Study in Shandong, China

|                                 |                                                                                                                                                                                                                                                                                                                                                                                                                                                                                                                                                                                                                                                                                                                                                                                                                                                                                                                                                                                                                                                                                                                                                                                                      |
|---------------------------------|------------------------------------------------------------------------------------------------------------------------------------------------------------------------------------------------------------------------------------------------------------------------------------------------------------------------------------------------------------------------------------------------------------------------------------------------------------------------------------------------------------------------------------------------------------------------------------------------------------------------------------------------------------------------------------------------------------------------------------------------------------------------------------------------------------------------------------------------------------------------------------------------------------------------------------------------------------------------------------------------------------------------------------------------------------------------------------------------------------------------------------------------------------------------------------------------------|
| Journal:                        | <i>BMJ Open</i>                                                                                                                                                                                                                                                                                                                                                                                                                                                                                                                                                                                                                                                                                                                                                                                                                                                                                                                                                                                                                                                                                                                                                                                      |
| Manuscript ID                   | bmjopen-2019-036454.R2                                                                                                                                                                                                                                                                                                                                                                                                                                                                                                                                                                                                                                                                                                                                                                                                                                                                                                                                                                                                                                                                                                                                                                               |
| Article Type:                   | Cohort profile                                                                                                                                                                                                                                                                                                                                                                                                                                                                                                                                                                                                                                                                                                                                                                                                                                                                                                                                                                                                                                                                                                                                                                                       |
| Date Submitted by the Author:   | 12-May-2020                                                                                                                                                                                                                                                                                                                                                                                                                                                                                                                                                                                                                                                                                                                                                                                                                                                                                                                                                                                                                                                                                                                                                                                          |
| Complete List of Authors:       | Wang, Xiang ; Shandong Provincial Hospital, Department of Neurology<br>Zhao, Yuanyuan; Shandong Provincial Hospital, Department of Neurology<br>Ji, Xiaokang; Shandong University School of Public Health, Department of biostatistics<br>Sang, Shaowei; Shandong University Qilu Hospital, Department of clinical epidemiology<br>Shao, Sai; Shandong Medical Imaging Research Institute, Department of Radiology<br>Yan, Peng; Shandong Provincial Hospital, Department of Neurology<br>Li, Shan; Shandong Provincial Hospital, Department of Neurology<br>Li, JiFeng; Shandong Provincial Hospital, Department of Neurology<br>Wang, Guangbin; Shandong Medical Imaging Research Institute, Department of Radiology<br>Lu, Ming; Shandong University, Department of clinical epidemiology<br>Du, YiFeng; Shandong Provincial Hospital, Department of Neurology<br>Xue, Fuzhong; Shandong University School of Public Health, Department of biostatistics<br>Qiu, Chengxuan; Shandong Provincial Hospital, Department of Neurology; Karolinska Universitetssjukhuset, Department of Neurobiology, Care Sciences and Society<br>Sun, QinJian; Shandong Provincial Hospital, Department of Neurology |
| <b>Primary Subject Heading</b>: | Epidemiology                                                                                                                                                                                                                                                                                                                                                                                                                                                                                                                                                                                                                                                                                                                                                                                                                                                                                                                                                                                                                                                                                                                                                                                         |
| Secondary Subject Heading:      | Cardiovascular medicine, Epidemiology, Neurology, Radiology and imaging                                                                                                                                                                                                                                                                                                                                                                                                                                                                                                                                                                                                                                                                                                                                                                                                                                                                                                                                                                                                                                                                                                                              |
| Keywords:                       | EPIDEMIOLOGY, Neurology < INTERNAL MEDICINE, Magnetic resonance imaging < RADIOLOGY & IMAGING, STROKE MEDICINE, VASCULAR MEDICINE                                                                                                                                                                                                                                                                                                                                                                                                                                                                                                                                                                                                                                                                                                                                                                                                                                                                                                                                                                                                                                                                    |
|                                 |                                                                                                                                                                                                                                                                                                                                                                                                                                                                                                                                                                                                                                                                                                                                                                                                                                                                                                                                                                                                                                                                                                                                                                                                      |

SCHOLARONE™  
Manuscripts





I, the Submitting Author has the right to grant and does grant on behalf of all authors of the Work (as defined in the below author licence), an exclusive licence and/or a non-exclusive licence for contributions from authors who are: i) UK Crown employees; ii) where BMJ has agreed a CC-BY licence shall apply, and/or iii) in accordance with the terms applicable for US Federal Government officers or employees acting as part of their official duties; on a worldwide, perpetual, irrevocable, royalty-free basis to BMJ Publishing Group Ltd ("BMJ") its licensees and where the relevant Journal is co-owned by BMJ to the co-owners of the Journal, to publish the Work in this journal and any other BMJ products and to exploit all rights, as set out in our [licence](#).

The Submitting Author accepts and understands that any supply made under these terms is made by BMJ to the Submitting Author unless you are acting as an employee on behalf of your employer or a postgraduate student of an affiliated institution which is paying any applicable article publishing charge ("APC") for Open Access articles. Where the Submitting Author wishes to make the Work available on an Open Access basis (and intends to pay the relevant APC), the terms of reuse of such Open Access shall be governed by a Creative Commons licence – details of these licences and which [Creative Commons](#) licence will apply to this Work are set out in our licence referred to above.

Other than as permitted in any relevant BMJ Author's Self Archiving Policies, I confirm this Work has not been accepted for publication elsewhere, is not being considered for publication elsewhere and does not duplicate material already published. I confirm all authors consent to publication of this Work and authorise the granting of this licence.

1  
2  
3  
4 **Cohort profile: the Kongcun Town Asymptomatic Intracranial Artery Stenosis Study in**  
5  
6 **Shandong, China**  
7  
8  
9

10  
11 Xiang Wang<sup>a,b</sup>, Yuanyuan Zhao<sup>a,b</sup>, Xiaokang Ji<sup>c</sup>, Shaowei Sang<sup>d</sup>, Sai Shao<sup>e</sup>, Peng Yan<sup>a,b</sup>,  
12  
13 Shan Li<sup>a,b</sup>, Jifeng Li<sup>a,b</sup>, Guangbin Wang<sup>e</sup>, Ming Lu<sup>d</sup>, Yifeng Du<sup>a,b</sup>, Fuzhong Xue<sup>c</sup>, Chengxuan  
14  
15 Qiu<sup>a,f</sup>, Qinjian Sun<sup>a,b\*</sup>  
16  
17  
18  
19  
20  
21

22 <sup>a</sup>Department of Neurology, Shandong Provincial Hospital, Cheeloo College of Medicine,  
23  
24 Shandong University, Jinan, Shandong, China  
25  
26

27 <sup>b</sup>Department of Neurology, Shandong Provincial Hospital Affiliated to Shandong First Medical  
28  
29 University, Jinan, Shandong, China  
30  
31

32 <sup>c</sup>Department of Biostatistics, School of Public Health, Shandong University, Jinan, Shandong,  
33  
34 China  
35  
36

37 <sup>d</sup>Department of Clinical Epidemiology, Qilu Hospital, Cheeloo College of Medicine, Shandong  
38  
39 University, Jinan, Shandong, China  
40  
41

42 <sup>e</sup>Department of Radiology, Shandong Medical Imaging Research Institute Affiliated to  
43  
44 Shandong University, Jinan, Shandong, China  
45  
46

47 <sup>f</sup>Aging Research Center, Department of Neurobiology, Care Science and Society, Karolinska  
48  
49 Institutet-Stockholm University, Stockholm, Sweden  
50  
51  
52

53  
54  
55  
56 **Running title:** The Kongcun Town Asymptomatic ICAS Study  
57

58 **Word count:** 4060  
59  
60

1  
2  
3  
4  
5  
6 \*Corresponding author:  
7

8  
9 Qinjian Sun

10  
11 Department of Neurology, Shandong Provincial Hospital, Cheeloo College of Medicine,  
12

13  
14 Shandong University

15  
16 Department of Neurology, Shandong Provincial Hospital Affiliated to Shandong First  
17

18  
19 Medical University

20  
21 # 324 Jingwu Weiqi Road, Jinan, Shandong 250021, P. R. China.  
22

23  
24 Email: sqj1210@163.com  
25  
26  
27  
28  
29  
30  
31  
32  
33  
34  
35  
36  
37  
38  
39  
40  
41  
42  
43  
44  
45  
46  
47  
48  
49  
50  
51  
52  
53  
54  
55  
56  
57  
58  
59  
60

## ABSTRACT

**Purpose:** The population-based Kongcun Town Asymptomatic Intracranial Artery Stenosis (KT-aICAS) study aims to investigate the prevalence of aICAS and major cardiovascular risk factors (CRFs) or biomarkers related to the development and prognosis of aICAS.

**Participants:** The KT-aICAS study included 2311 rural residents who were aged  $\geq 40$  years and living in Kongcun Town, Shandong Province, China. Baseline examination was conducted from October 2017 to October 2018, during which information on demographics, socioeconomics, personal and family medical history, and lifestyle factors was collected through face-to-face interviews, physical examination, and blood tests. Asymptomatic ICAS was initially screened using transcranial Doppler examination and then diagnosed using magnetic resonance angiography. Atherosclerosis in carotid arteries was diagnosed via carotid ultrasonography. High-resolution magnetic resonance imaging was further used to evaluate the vessel wall of aICAS. Neuropsychological assessments were performed in the participants diagnosed with aICAS and the age- and sex-matched controls.

**Findings to date:** Of the 2311 participants, 2027 (87.7%) completed the diagnostic procedure and aICAS was detected in 154 persons, resulting in an overall prevalence of 7.6%. The prevalence of aICAS increased with advancing age from 5.1% in participants aged 40-49 years to 12.7% in those aged  $\geq 70$  years ( $P < 0.001$ ). Asymptomatic ICAS was detected in 305 intracranial arteries, including 221 (72.5%) in the anterior circulation and 84 (27.5%) in the posterior circulation ( $P < 0.001$ ). In addition, major CRFs were highly prevalent among middle-aged and elderly rural dwellers who were free of clinical stroke.

1  
2  
3  
4 **Future plans:** Follow-up examinations will be performed every 3 years following the  
5  
6 baseline examination. This study will increase our knowledge about the natural history of  
7  
8 aICAS and facilitate studies of aICAS-associated disorders among rural-dwelling Chinese  
9  
10 adults, such as ischaemic stroke and vascular cognitive impairment.  
11  
12  
13  
14  
15  
16

### 17 **Strengths and limitations of this study**

- 19 ➤ This population-based study integrated TCD and MRA to detect aICAS among residents  
20  
21 living in rural communities, which is feasible to investigate prevalence of aICAS in rural  
22  
23 residents.  
24  
25
- 26 ➤ High-resolution MRI scans were used to further identify characteristics of aICAS.  
27  
28
- 29 ➤ The use of TCD as a screening tool for aICAS might have missed some cases and  
30  
31 underestimated the prevalence of aICAS.  
32  
33
- 34 ➤ The study sample was selected from only one rural area, and thus, cautiousness is needed  
35  
36 when generalizing the study findings to other rural populations in China.  
37  
38  
39  
40  
41  
42  
43  
44  
45  
46  
47  
48  
49  
50  
51  
52  
53  
54  
55  
56  
57  
58  
59  
60

## INTRODUCTION

Intracranial artery stenosis (ICAS) due to atherosclerosis is a leading cause of ischaemic stroke worldwide, especially in Asian populations[1]. In addition, intracranial atherosclerosis has been associated with cognitive impairment[2]. Atherosclerotic lesions may develop and progress silently over years, subsequently impair cognitive function, or even suddenly cause clinical stroke. Therefore, the detection of ICAS in the asymptomatic phase may facilitate early preventive and therapeutic interventions, and thus delay the progression to symptomatic stroke and cognitive impairment[3, 4]. Several population-based studies that investigated the prevalence of asymptomatic ICAS (aICAS, ie, ICAS without a history of stroke or transient ischaemic attack [TIA]) by using non-invasive tools, such as transcranial ultrasound or magnetic resonance angiography (MRA), suggested that the prevalence of aICAS ranged from around 9% in Caucasian populations[5, 6] and 12% in African-Americans[6] to as high as 24.5% in Asian populations[7-10]. The substantial racial differences in the prevalence and distribution of aICAS could be due partly to different genetic and environmental factors[11]. Therefore, the study involving Asian populations who are more vulnerable to ICAS or aICAS may shed light on the effects of genetic backgrounds, circumstances or social customs, and habits difference on the development of ICAS or aICAS. Moreover, data remain limited with regard to the prevalence of aICAS among rural residents in China, where cardiovascular risk factors (CRFs) are highly prevalent and poorly controlled[12].

Furthermore, the natural history and prognosis of aICAS remains poorly understood. The Warfarin versus Aspirin Symptomatic Intracranial Disease trial showed that the risk of stroke from aICAS was relatively low among patients with co-existing symptomatic ICAS

1  
2  
3  
4 and aICAS[13]. In addition, asymptomatic atherosclerotic stenosis of the middle cerebral  
5  
6 artery (MCA) is apparently not a malignant disease[14, 15]. These studies suggest that aICAS  
7  
8 may have a benign long-term prognosis. It is worth noting that these previous studies have  
9  
10 either focused on selective patient groups (co-existence of asymptomatic and symptomatic  
11  
12 stenosis) or targeted special vessels (e.g., MCA), and the general population-based studies  
13  
14 that aimed at investigating the prognosis of aICAS remain scarce. Indeed, a population-based  
15  
16 prospective study of 2807 healthy volunteers (mean age, 62.0 years) in Japan found that  
17  
18 aICAS was a risk factor for clinical stroke[16]. However, the predictors for the conversion  
19  
20 and progression from aICAS to the symptomatic stage remain largely unclear.  
21  
22  
23  
24  
25  
26

27 Symptomatic ICAS (i.e., ICAS with a history of stroke or TIA) is an independent risk  
28  
29 factor for cognitive decline. However, whether aICAS is associated with subsequent  
30  
31 cognitive decline remains to be explored. Recently, a clinical-based study suggested that in  
32  
33 participants with asymptomatic severe MCA stenosis, poor collateral circulation was  
34  
35 associated with declines in multiple cognitive domains characterized by vascular cognitive  
36  
37 impairment[17]. The association between cognitive function and aICAS in other intracranial  
38  
39 arteries remains to be clarified.  
40  
41  
42  
43  
44

45 Therefore, we initiated the Kongcun Town aICAS (KT-aICAS) study in Shandong  
46  
47 Province, China. This cohort profile aimed to describe the establishment of the study cohort,  
48  
49 baseline assessments, and some of the findings from this cohort.  
50  
51  
52  
53  
54

## 55 56 **Cohort description**

### 57 58 ***Study Design and Purposes***

1  
2  
3  
4 KT-aICAS is designed as a population-based prospective cohort study. The purposes of the  
5  
6 KT-aICAS were: (1) to investigate occurrence (e.g., prevalence and incidence) and  
7  
8 distribution of aICAS among middle-aged and older adults living in rural communities; (2) to  
9  
10 explore CRFs and clinical biomarkers of aICAS that may predict the progression from aICAS  
11  
12 to ischaemic stroke; (3) to assess the association between aICAS and cognitive impairment;  
13  
14 and (4) to build a comprehensive database that facilitates longer-term multidisciplinary  
15  
16 research regarding the biomedical, clinical, neuroimaging, and epidemiological aspects of  
17  
18 aICAS. At baseline, a cross-sectional study was conducted to detect the prevalence and  
19  
20 distribution of aICAS. A subsequent follow-up assessment will be performed to determine  
21  
22 the incidence rates of aICAS, examine the association between aICAS and ischaemic stroke,  
23  
24 and explore a variety of CRFs, clinical features, imaging markers or biomarkers for the  
25  
26 conversion from aICAS to symptomatic ICAS, clinical stroke or TIA, and the potential  
27  
28 cognitive consequences.  
29  
30  
31  
32  
33  
34  
35  
36

### 37 ***Study Communities and Population***

38  
39  
40 The KT-aICAS Study targeted all registered residents who were aged  $\geq 40$  years, free of a  
41  
42 history of stroke or TIA, and living in the Kongcun Town of Pingyin county in Shandong  
43  
44 Province in October 2017. Self-report of a physician diagnosis and/or clinical examinations  
45  
46 showing typical symptoms were consider as a history of stroke or TIA, which was  
47  
48 determined during the interviews and clinical examination. Kongcun Town is a rural  
49  
50 township that is located  $\sim 76$  km west of Jinan, the capital of Shandong Province, China.  
51  
52 Kongcun Town includes  $\sim 30000$  residents in an area of  $\sim 5000$  hectares. The majority of  
53  
54 people in the town are farmers. Since 2009, the School of Public Health at Shandong  
55  
56  
57  
58  
59  
60



1  
2  
3  
4 University has been working closely with the town government and local health professionals  
5  
6 to conduct epidemiological surveys on health conditions of local residents every 3 years. This  
7  
8 helped improve the cooperation from local residents (e.g., a high participation rate at baseline  
9  
10 and possibly high adherence to future follow-up assessments) for implementing this project.  
11  
12  
13  
14 Following the baseline assessment in 2017-2018, all participants will be invited to undertake  
15  
16 a follow-up assessment every 3 years with the aim of detecting patients with aICAS and  
17  
18 identifying incident clinical stroke and cognitive impairment. Figure 1 shows the basic design  
19  
20 of the KT-aICAS Study and the flowchart of the study population and assessments.  
21  
22  
23

### 24 ***Ethics Approval and Consent to Participate***

25  
26  
27 The protocol of the KT-aICAS Study was reviewed and approved by the ethical standards  
28  
29 committees on human experimentation at Shandong Provincial Hospital, Cheeloo College of  
30  
31 Medicine, Shandong University. Written informed consent was obtained from all of the  
32  
33 participants. The study was conducted in accordance with the ethical principles for medical  
34  
35 research involving human subjects expressed in the Declaration of Helsinki. The face-to-face  
36  
37 interviews were scheduled at the most convenient times for the participants. Respondents  
38  
39 were free to refuse participation or withdraw from the study at any time. Any case of serious  
40  
41 illness that had not been detected previously, was urgently referred to the local hospital for  
42  
43 further examinations. All participant-related information was de-identified from the database  
44  
45  
46  
47  
48  
49  
50  
51 to preserve privacy.  
52  
53  
54  
55

### 56 ***Baseline Assessments***

1  
2  
3  
4 Baseline assessments were performed in October 2017-October 2018, which included a two-  
5  
6 phase design as described below.  
7

### 8 9 *Phase 1*

10  
11 From October to November 2017, we performed a phase 1 assessment, a screening phase that  
12  
13 aimed to collect baseline data and identify people at high risk of aICAS. During this phase,  
14  
15 all participants underwent a structured questionnaire survey, a transcranial Doppler (TCD)  
16  
17 examination, and a colour Doppler ultrasound examination (neck) on the same day.  
18  
19

20  
21 *Face-to-face interviews.* A standardized questionnaire was used to collect data on  
22  
23 demographic features, health and family history (e.g., chronic diseases), CRFs (e.g.,  
24  
25 hypertension, diabetes, and obesity), lifestyle factors (e.g., diet habits, smoking, alcohol  
26  
27 consumption, tea consumption, and physical activity), menstrual and reproductive history,  
28  
29 quality of life, and current use of medication[18, 19]. Typically, the interview took  
30  
31 approximately 30 minutes. Then, all participants underwent physical and clinical  
32  
33 examinations, which included blood pressure and anthropometric measurements, carotid  
34  
35 artery B-mode ultrasonography, and TCD examination.  
36  
37

38  
39 *Blood pressure and anthropometric measurements.* All measurements were performed by  
40  
41 trained nurses. After a 5-min rest, arterial blood pressure was measured twice at a 5-min  
42  
43 interval using an automated sphygmomanometer with the participant in the seated position.  
44  
45 The mean value of the two measurements was used in the analysis. Hypertension was defined  
46  
47 as blood pressure  $\geq 140/90$  mmHg or use of antihypertensive drugs. Height was measured  
48  
49 without shoes using a standard right-angle device and a fixed measurement tape (to the  
50  
51  
52  
53  
54  
55  
56  
57  
58  
59  
60

1  
2  
3  
4 nearest 0.5 cm). Body weight without heavy clothing was measured. We defined obesity as a  
5  
6 body mass index (BMI)  $\geq 28$  kg/m<sup>2</sup> and overweight as a BMI of 24-27.9 kg/m<sup>2</sup>.  
7

8  
9 *TCD ultrasound examination.* Participants were examined with a portable machine (VIASYS  
10  
11 Companion III, Nicolet, Washington, United States) by two experienced physicians with  
12  
13 expertise in sonography after a 5-min rest in a quiet and comfortable room. The bilateral  
14  
15 MCA, anterior cerebral artery (ACA), posterior cerebral artery (PCA), vertebral artery (VA),  
16  
17 and basilar artery (BA) were examined with a 2 MHz probe through a temporal window,  
18  
19 occipital window, and eye window, respectively. The depth, peak systolic velocity (PSV),  
20  
21 mean flow velocity (MFV), end diastolic velocity, and pulsatility index were measured for  
22  
23 each artery. The following MFV cut-offs were used for the diagnosis of  $\geq 50\%$  intracranial  
24  
25 stenosis of various arteries according to the criteria described in the Stroke Outcomes and  
26  
27 Neuroimaging of Intracranial Atherosclerosis (SONIA) trial[20]: MFV  $\geq 100$  cm/s for MCA  
28  
29 stenosis, MFV  $\geq 80$  cm/s for VA stenosis, and MFV  $\geq 80$  cm/s for BA stenosis. Because the  
30  
31 ACA and PCA were not evaluated in the SONIA trial, we followed previously validated  
32  
33 criteria to define  $\geq 50\%$  stenosis in these vessels[21]: MFV  $\geq 80$  cm/s and  $\geq 30\%$  different  
34  
35 when compared to the contralateral ACA segment for ACA stenosis and MFV  $\geq 80$  cm/s for  
36  
37 PCA stenosis. The criteria for  $\geq 70\%$  stenosis were as follows[22]: MCA: MFV  $\geq 120$  cm/s or  
38  
39 a stenotic/prestenotic ratio  $\geq 3$  or low velocity; VA and BA: MFV  $\geq 110$  cm/s or a  
40  
41 stenotic/prestenotic ratio  $\geq 3$ . In addition, the presence of turbulence or musical sounds and an  
42  
43 abnormal segmental velocity were considered for the diagnosis of stenosis.  
44  
45  
46  
47  
48  
49  
50  
51  
52  
53

54  
55  
56 *Carotid ultrasonography examination.* Carotid ultrasound examination was performed in the  
57  
58 head-straight flat supine position by two experienced physicians to measure intimal medial  
59  
60

1  
2  
3  
4 thickness (IMT), PSV, and EDV of the common carotid artery (CCA), internal carotid artery  
5  
6 (ICA), and external carotid artery (ECA) with a 7-MHz linear transducer (Siemens ACUSON  
7  
8 P500). First, the structure of the vascular wall of the full-length of the CCA and the  
9  
10 bifurcation and the initial segment of the ICA as well as atherosclerotic plaques and  
11  
12 intravascular echo were measured in a cross-section. Then, the IMT of the distal segment of  
13  
14 the CCA (1 to 1.5 cm below the bifurcation level), the internal diameter of the ICA, and the  
15  
16 distal segment of the CCA were measured in longitudinal sections. The diameter was defined  
17  
18 as the vertical distance between the upper edge of the posterior wall of the vessel and the  
19  
20 inferior border of the anterior wall. When vessel stenosis occurred, the residual diameter and  
21  
22 original diameter were measured. The thickness of the IMT was defined as the vertical  
23  
24 distance between the upper edge of the posterior wall of the vessel and the upper edge of the  
25  
26 outer membrane. Location, morphology, and integrity of the fibrous cap and the acoustic  
27  
28 characteristics of the plaque were observed, and the size of the plaque was measured. Intimal  
29  
30 thickening was defined as intimal-middle film thickness  $\geq 1.0$  mm, and plaque was defined as  
31  
32 focal intimal-middle film thickness  $\geq 1.5$  mm[23].  
33  
34  
35  
36  
37  
38  
39  
40  
41  
42

43 *Laboratory tests.* After overnight fasting, participants came to the local clinic, and peripheral  
44  
45 venous blood samples were taken in the morning. The blood was then allowed to clot in a 37  
46  
47 °C water bath for 30 minutes before it was centrifuged at 3,000 rpm for 15 minutes. Then, the  
48  
49 serum supernatant was collected and separated into five aliquots (200  $\mu$ L per aliquot) and  
50  
51 immediately stored in liquid nitrogen. Blood tests were conducted at the certified clinical  
52  
53 laboratory of the Shandong Provincial Hospital Affiliated to Shandong University. We  
54  
55 measured a complete blood count in the whole blood as well as serum fasting blood glucose  
56  
57  
58  
59  
60

(FBG), liver function, renal function, high-density lipoprotein-cholesterol (HDL-C), low-density lipoprotein-cholesterol (LDL-C), triglyceride, apolipoprotein genotyping, homocysteine, supersensitivity C-reactive protein, and insulin. The remaining serum samples were stored at -80 °C until further analyses. Diabetes was defined as FBG  $\geq 7.0$  mmol/l or current use of blood glucose-lowering agents or insulin injection. High cholesterol was defined as total cholesterol  $\geq 6.20$  mmol/l or current use of hypolipidaemic drugs, and dyslipidaemia was defined as total cholesterol  $\geq 6.20$  mmol/l, triglycerides  $\geq 1.8$  mmol/l, HDL-C  $< 1.11$  mmol/l or LDL-C  $\geq 3.36$  mmol/l or current use of hypolipidaemic drugs.

### *Phase 2*

From April to October 2018, participants who were screened positive, and a group of age- and sex-matched controls (1:1) who were screened negative for aICAS by TCD in Phase 1, underwent Phase 2 assessment in our hospital, which included neuropsychological assessments, structural brain MRI scans, and MRA.

*MRI protocol and acquisition.* All invited participants underwent brain MRI scans on a 3.0T scanner (Achieve; Philips Medical Systems, Best, The Netherlands) with an 8-channel head coil. The core MRI protocol included MRA, dynamic susceptibility contrast-enhanced perfusion-weighted imaging (DSC-PWI), diffusion tensor imaging (DTI), T1-weighted imaging with 3D variable refocusing flip angle volume isotropic turbo spin-echo acquisition (3D T1VISTA), 3D T2VISTA, fluid-attenuated inversion recovery images, and contrast-enhanced T1VISTA. The post-enhanced T1VISTA parameters were the same as those used for pre-T1VISTA. A gadolinium contrast medium (Gd-DTPA, Magnevist, Beijing BeiLu Pharmaceutical Co., Ltd., Beijing, China) was intravenously injected at the third acquisition

1  
2  
3  
4 (0.2 mL/kg or 4.5 mL/s followed immediately by a 30 mL physiological saline flush). The  
5  
6 extent of stenosis in the five evaluated arteries (bilateral MCA, bilateral intracranial ICA, and  
7  
8 BA) was classified into five grades by consensus as normal, mild (signal reduction <50%),  
9  
10 moderate (signal reduction  $\geq$ 50% and <70%), severe (signal reduction  $\geq$ 70%), or occlusion  
11  
12 (focal signal loss with the presence of distal signal). The diagnosis and grading of stenosis  
13  
14 was performed by a neurologist specializing in stroke and a clinical neuroradiologist.  
15  
16  
17

18  
19 *Neuropsychological evaluation.* Neuropsychological assessments were performed by  
20  
21 experienced neuropsychologists trained specifically for this project and included tests of  
22  
23 global cognitive function and specific cognitive domains. The Chinese versions of the Mini-  
24  
25 Mental State Examination (MMSE) and the Montreal Cognitive Assessment (MoCA) were  
26  
27 used to assess global cognitive function[24]. Specific cognitive domains (e.g., episodic  
28  
29 memory, verbal fluency, attention, and executive function) were assessed using the following  
30  
31 neuropsychological tests: (1) the Rey Auditory Verbal Learning Test Learning (RAVLT:  
32  
33 direct recall, delayed recall, and word list recognition) for episodic memory[25], the Fuld-  
34  
35 object Memory Evaluation (FOM) for object memory[26], (2) the Category Verbal Fluency  
36  
37 test (CVF) for verbal performance and executive function[27], (3) the Trail Making Test  
38  
39 (TMT A&B) for executive function[28], (4) the Wechsler Memory Scale-III Forward Digit  
40  
41 Span (FDS) and Backward Digit Span(BDS) for attention and executive function[29], and (5)  
42  
43 the Wechsler block design test and Clock Drawing Test (CDT) for visuospatial and motor  
44  
45 skills[30]. In addition, depressive symptoms were assessed using the Hamilton depression  
46  
47 Scale (HAMD)[31]. The Barthel index was used to assess basic activities of daily living  
48  
49 (ADL)[32].  
50  
51  
52  
53  
54  
55  
56  
57  
58  
59  
60

1  
2  
3  
4 *Quality control procedure.* Before the beginning of the study, all staff were centrally trained  
5  
6 and required to demonstrate competency to perform different assessments, including  
7  
8 interviews, biospecimen acquisition, cerebrovascular assessments, and cognitive testing.  
9  
10  
11 Psychologists, neuroradiologists, and neurologists attended a standardization meeting to  
12  
13 ensure the consistency of application of the evaluation criteria. The data collection and  
14  
15 processing were checked and verified by at least two people, and the entry of the collected  
16  
17 data was completed via integral double entry.  
18  
19  
20

### 21 ***Statistical Analysis***

22  
23  
24 The data are presented as frequencies (%) for categorical variables and as the mean (SD) or  
25  
26 median (interquartile range, IQR) for continuous variables. Characteristics of the study  
27  
28 participants by sex were compared using the general linear regression model for continuous  
29  
30 variables and chi-square test for categorical variables. We describe the distribution of major  
31  
32 CRFs and aICAS. We used the statistical packages R (<http://www.r-project.org>; version  
33  
34 3.4.3) and EmpowerStats ([www.empowerstats.com](http://www.empowerstats.com); X&Y Solutions Inc.) for all analyses.  
35  
36  
37  
38  
39

### 40 ***Follow-up assessments***

41  
42 All survivors of the baseline participants will be invited to undertake a follow-up evaluation  
43  
44 in the third year. The same questionnaire used for the baseline survey will be used during the  
45  
46 follow-up examination for collecting epidemiological, neuropsychological, and clinical data.  
47  
48  
49 Analysis of biomarkers as well as TCD test, carotid ultrasonography examination, and brain  
50  
51 MRI scan will also be performed.  
52  
53  
54  
55  
56  
57

### 58 **Patient and public involvement**

1  
2  
3  
4 No patients or public were involved in the development of research questions and the design  
5  
6 of the project. Participants were informed of the examination procedures and the main results  
7  
8 of the examination, and contributed to the data used for this study. We plan to disseminate the  
9  
10 key findings from the project among participants and local residents as part of health  
11  
12 education and promotion program.  
13  
14  
15  
16  
17  
18

### 19 **Findings to date**

20  
21  
22 In this ongoing prospective cohort study of middle-aged and older adults who were free of  
23  
24 clinical stroke, we have demonstrated the feasibility of a two-phase procedure to study the  
25  
26 epidemiology and nature history of aICAS in the remote rural communities by integrating  
27  
28 epidemiological approaches with clinical, neuroimaging, and neuropsychological techniques.  
29  
30  
31

32 The characteristics of baseline participants in KT-aICAS by sex are reported in [table 1](#).  
33  
34 Compared with men, women were older, less educated, and less likely to be single, and had  
35  
36 higher levels of total cholesterol, triglycerides, LDL-C, and BMI, but lower levels of diastolic  
37  
38 pressure and HDL-C. There was no significant sex difference in levels of FBG or systolic  
39  
40 pressure and prevalence of hypertension. Men were much more likely to smoke and consume  
41  
42 alcohol than women across all age groups, whereas women had a higher prevalence of  
43  
44 diabetes, obesity and a higher cholesterol level than men mainly in groups over 60 years of  
45  
46 age ([figure 2](#)). The sociocultural tradition in China, especially in rural regions, could explain  
47  
48 the sex differences in behavioural factors such as smoking and alcohol consumption[33]. In  
49  
50 addition, the differences in health conditions between men and women might be partially  
51  
52 attributable to sex differences in factors such as educational achievement, socioeconomic  
53  
54  
55  
56  
57  
58  
59  
60



1  
2  
3  
4 position, and other unmeasured lifestyle factors (e.g., diet). Taken together, our data showed  
5  
6 that major CRFs were highly prevalent among the rural-dwelling middle-aged and elderly  
7  
8 people in western Shandong Province, China and that there were substantial sex differences  
9  
10 in certain lifestyle factors. We have reported that these CRFs, especially when coexisting, are  
11  
12 strongly correlated with aICAS[34]. Among the subsample of people who received  
13  
14 neuropsychological tests, men had a higher score than women in the MMSE test ( $P=0.001$ ),  
15  
16 but not in MoCA test ( $P=0.088$ ), in which higher educational attainments in men than in  
17  
18 women may partly contribute to the sex differences in the global cognitive tests because  
19  
20 MMSE test is more sensitive to education than MoCA test. The potential cognitive  
21  
22 consequence of CRFs and aICAS will be fully analysed in a future study. Therefore, given  
23  
24 the well-established aetiological relationship of CRFs with atherosclerosis and clinical stroke  
25  
26 in the literature as well as findings from our study, active interventions to target these  
27  
28 modifiable risk factors are urgently needed to counteract the huge burden of stroke in rural  
29  
30 areas of China.  
31  
32  
33  
34  
35  
36  
37  
38  
39

40 Of the 2311 participants, 2027 (87.7%) completed the diagnostic procedure for aICAS.  
41  
42 Out of the 2027 participants, 437 (21.5%) participants have poor temporal window, and 154  
43  
44 persons (92 women and 62 men) were diagnosed with aICAS, which corresponded to the  
45  
46 overall prevalence of 7.6% (8.7% in women vs. 6.4% in men,  $P=0.055$ ). The overall  
47  
48 prevalence of aICAS increased with advancing age, from 5.1% in individuals aged 40-49  
49  
50 years to 12.7% in those aged  $\geq 70$  years ( $p$  for trend  $<0.001$ ) (figure 3). There was a sex  
51  
52 difference in the patterns of age-specific prevalence of aICAS, such that the prevalence  
53  
54 increased steadily with age in men (from 2.8% in 40-49 years of age to 12.9% in people aged  
55  
56  
57  
58  
59  
60

1  
2  
3  
4  $\geq 70$  years) (p for trend  $< 0.001$ ), but in women the prevalence was relatively stable from 40 to  
5  
6 60 years of age (just over 8%), and then substantially increased (12.8% in people aged  $\geq 70$   
7  
8 years) (p for trend = 0.141). The reason for the sex differences is not fully understood, but the  
9  
10 fast increase in the prevalence of aICAS with age after 60 years of age might be partially due  
11  
12 to a decrease in estrogen levels among postmenopausal women[35]. Indeed, evidence has  
13  
14 suggested that oestrogens have atheroprotective effect via anti-inflammation, protection of  
15  
16 vascular endothelial cells, and other mechanisms[36, 37], and that menopause has an  
17  
18 unfavorable impact on several cardiovascular risk factors, structure of large arteries, and  
19  
20 atherosclerosis[38].  
21  
22  
23  
24  
25

26  
27 A total of 305 intracranial arteries were diagnosed with aICAS; 221 (72.5%) were  
28  
29 involved in ACA, MCA or ICA, and 84 (27.5%) were involved in PCA, VA or BA (table 2).  
30  
31 The distributions of aICAS by regional arteries were as follows: ACA, 55 (18.0%) arteries;  
32  
33 MCA, 95 (31.1%) arteries; ICA, 71 (23.3%) arteries; PCA, 38 (12.5%) arteries; VA, 25  
34  
35 (8.2%) arteries; BA, 21 (6.9%) arteries. The arteries in the anterior circulation were more  
36  
37 frequently involved than arteries in the posterior circulation.  
38  
39  
40  
41  
42

43 Most previous studies have used either TCD or MRA alone to diagnose aICAS, and  
44  
45 different detection approaches and procedures may contribute to the substantial variations in  
46  
47 the reported prevalence of aICAS. For example, the prevalence of aICAS was reported to be  
48  
49 13.2% among coal mine workers aged  $\geq 40$  years in a study that used only TCD to detect  
50  
51 aICAS, whereas another study of people aged  $\geq 40$  years (mean age, 58.1 years) from Korea  
52  
53 reported that the prevalence of aICAS was 24.5% in all intracranial vessels[7]. We used a  
54  
55 two-phase approach that included a screening phase with TCD examination followed by a  
56  
57  
58  
59  
60

1  
2  
3  
4 diagnostic phase with MRA, and we found that the overall prevalence of aICAS was 7.6% in  
5  
6 this rural-dwelling middle-aged and elderly population. TCD examination, when used as a  
7  
8 tool for detecting arterial stenosis, has the advantage of convenience and non-invasiveness  
9  
10 but also has a high negative predictive value (~90%); thus, TCD is suitable for screening  
11  
12 arterial stenosis in a large-scale population study. However, the positive predictive value of  
13  
14 TCD examination is only ~50%. In contrast, MRA provides a good positive predictive value  
15  
16 for ICAS but may not be suitable for large-scale community-based studies due to its high  
17  
18 costs and inconvenience[20]. In this study, we combined TCD with MRA to detect aICAS,  
19  
20 which is feasible especially among people who are living in the remote rural communities.  
21  
22 This approach will allow us to obtain a more accurate estimate of aICAS prevalence than that  
23  
24 was achieved in previous studies used either TCD or MRA alone.  
25  
26  
27  
28  
29  
30  
31

32 We also found that the distribution of aICAS was more common in the anterior  
33  
34 circulation than in the posterior circulation, in accordance with a study from Japan[39]. The  
35  
36 variations in the regional arterial distribution of aICAS are likely due to differences in the  
37  
38 anatomical and haemodynamic characteristics between the anterior and posterior circulation.  
39  
40 For example, in the anterior circulation, the higher number of vascular branches may increase  
41  
42 the risk of atherosclerosis[40]. In addition, TCD has relatively low sensitivity in detecting  
43  
44 posterior circulation stenosis[41], and this may have contributed, in part, to the differences  
45  
46 observed in the regional arterial distribution of aICAS.  
47  
48  
49  
50  
51  
52

53 In summary, in the community-based KT-aICAS study, aICAS affected nearly one-tenth  
54  
55 of the rural-dwelling middle-aged and elderly residents, and its prevalence increased with  
56  
57 advanced age. Anterior circulation arteries were most vulnerable to atherosclerotic lesions. In  
58  
59  
60

1  
2  
3  
4 addition, major CRFs were highly prevalent among middle-aged and elderly rural dwellers  
5  
6 who were free of stroke. These findings may have important implications for the primary  
7  
8 prevention of aICAS, clinical stroke, and cognitive impairment. Future follow-up data from  
9  
10 this cohort may contribute to the understanding of the epidemiology and natural history as  
11  
12 well as cognitive consequences of aICAS among rural residents in China.  
13  
14  
15  
16  
17  
18  
19

### 20 **Strengths and Limitations**

21  
22 This cohort study targeted residents living in rural communities in China, to whom the  
23  
24 research community has so far paid little attention. Second, we integrated TCD and MRA  
25  
26 into a two-phase procedure to detect aICAS in a large-scale population study, and this  
27  
28 approach is likely to allow us to obtain a relatively accurate estimate of the prevalence of  
29  
30 aICAS. Furthermore, high-resolution MRI scans could help further evaluate the  
31  
32 characteristics of arterial stenosis and avoid the contamination of ICAS cases with cases  
33  
34 involving other non-atherosclerotic diseases[42]. In addition, high-resolution MRI can be  
35  
36 used to detect intraplaque haemorrhage, lipid cores, and artery fibrous caps, thus providing  
37  
38 further insight into the long-term prognosis of aICAS. To the best of our knowledge, this is  
39  
40 the first community-based study of aICAS among an Asian population that used high-  
41  
42 resolution MRI as well as PWI images and DTI images.  
43  
44  
45  
46  
47  
48  
49

50 Our study also has limitations. First, we used TCD as a screening tool for arterial  
51  
52 stenosis, which might have missed some cases of aICAS, and thus, have underestimated the  
53  
54 overall prevalence of aICAS. Furthermore, in case of a poor or incomplete echo window for  
55  
56 TCD, people without any stenosis in the VA, BA, and ACA were considered to be non-  
57  
58  
59  
60

1  
2  
3  
4 stenotic. This might also have resulted in the underestimation of the true prevalence of aICAS  
5  
6 in this population. Finally, our study sample was selected from only one rural area and the  
7  
8 cohort might differ from other rural populations given that the local residents previously  
9  
10 underwent health surveys, which should be kept in mind when generalizing our findings to  
11  
12 other rural populations.  
13  
14  
15  
16  
17  
18

19 **Acknowledgements** We would like to thank all the study participants, the staff of the  
20  
21 participating hospitals, and the Steering Committee Members of the Kongcun Town Study.  
22  
23

24 **Author Contributions** QS, FX, and YD conceived the research question and designed  
25  
26 the study. XW and FX conducted the statistical analysis. XW, CQ, and QS wrote the first and  
27  
28 subsequent drafts of the manuscript. XJ, SwS, SS, YZ, PY, SL, JL, GW, and ML contributed  
29  
30 to the epidemiological investigation. All authors contributed to data interpretation and critical  
31  
32 revisions of the manuscript, and approved the final version of the submitted manuscript.  
33  
34  
35  
36

37 **Funding** This Study was supported by the grants from Jinan Science and Technology  
38  
39 Bureau (201704101), Department of Science and Technology of Shandong Province  
40  
41 (2014GSF118106, 2016GSF201062, and ZR2017MH114), the National Nature Science  
42  
43 Foundation of China (8171101298, 81971128), the China Ministry of Sciences and  
44  
45 Technology (2017YFC1310100 and 2017YFC0907003), and the International Science and  
46  
47 Technology Cooperation Programme (2014DFA 32830). C Qiu received grants from the  
48  
49 Swedish Research Council for the Sino-Sweden Network for Aging Research (2017-00740)  
50  
51 and the Sino-Sweden Joint Research Project (2017-05819), Stockholm, Sweden and the  
52  
53 Taishan Oversea Scholar Program of Shandong Province, China.  
54  
55  
56  
57  
58  
59  
60

1  
2  
3  
4 **Competing interests** None declared.  
5

6 **Participant consent** Obtained.  
7

8  
9 **Ethics approval** Shandong Provincial Hospital, Cheeloo College of Medicine,  
10 Shandong University in Jinan, Shandong, China (2017566).  
11

12  
13  
14 **Provenance and peer review** Not commissioned; externally peer reviewed.  
15

16  
17 **Data sharing statement** Data are available upon reasonable request. Collaboration is  
18 welcomed and data sharing can be agreed upon. The corresponding author can be contacted  
19 (sqj1210@163.com).  
20  
21

22  
23  
24 **Open Access** This is an Open Access article distributed in accordance with the Creative  
25 Commons Attribution Non Commercial (CC BY-NC 4.0) license, which permits others to  
26 distribute, remix, adapt, build upon this work non-commercially, and license their derivative  
27 works on different terms, provided the original work is properly cited and the use is non-  
28 commercial.  
29  
30  
31  
32  
33  
34  
35  
36  
37  
38  
39  
40  
41  
42  
43  
44  
45  
46  
47  
48  
49  
50  
51  
52  
53  
54  
55  
56  
57  
58  
59  
60

## References

1. Bos D, Portegies ML, van der Lugt A, Bos MJ, Koudstaal PJ, Hofman A, Krestin GP, Franco OH, Vernooij MW, Ikram MA: **Intracranial carotid artery atherosclerosis and the risk of stroke in whites: the Rotterdam Study.** *JAMA Neurol* 2014, **71**(4):405-411.
2. Beach TG, Wilson JR, Sue LI, Newell A, Poston M, Cisneros R, Pandya Y, Esh C, Connor DJ, Sabbagh M *et al*: **Circle of Willis atherosclerosis: association with Alzheimer's disease, neuritic plaques and neurofibrillary tangles.** *Acta Neuropathol* 2007, **113**(1):13-21.
3. Battistella V, Elkind M: **Intracranial atherosclerotic disease.** *Eur J Neurol* 2014, **21**(7):956-962.
4. Parfenov VA, Ostroumova OD, Ostroumova TM, Kochetkov AI, Fateeva VV, Khacheva KK, Khakimova GR, Epstein OI: **Vascular cognitive impairment: pathophysiological mechanisms, insights into structural basis, and perspectives in specific treatments.** *Neuropsychiatric disease and treatment* 2019, **15**:1381-1402.
5. Lopez-Cancio E, Dorado L, Millan M, Reverte S, Sunol A, Massuet A, Galan A, Alzamora MT, Pera G, Toran P *et al*: **The Barcelona-Asymptomatic Intracranial Atherosclerosis (AsIA) study: prevalence and risk factors.** *Atherosclerosis* 2012, **221**(1):221-225.
6. Suri MF, Qiao Y, Ma X, Guallar E, Zhou J, Zhang Y, Liu L, Chu H, Qureshi AI, Alonso A *et al*: **Prevalence of Intracranial Atherosclerotic Stenosis Using High-Resolution Magnetic Resonance Angiography in the General Population: The Atherosclerosis Risk in Communities Study.** *Stroke* 2016, **47**(5):1187-1193.
7. Bae HJ, Lee J, Park JM, Kwon O, Koo JS, Kim BK, Pandey DK: **Risk factors of intracranial cerebral atherosclerosis among asymptomatics.** *Cerebrovascular diseases (Basel, Switzerland)* 2007, **24**(4):355-360.
8. Wang A, Li Z, Luo Y, Liu X, Guo X, Wu S, Zhao X, Jonas JB: **Asymptomatic intracranial arterial stenosis and metabolic syndrome: the APAC study.** *PloS one* 2014, **9**(12):e113205.
9. Wong KS, Ng PW, Tang A, Liu R, Yeung V, Tomlinson B: **Prevalence of asymptomatic intracranial atherosclerosis in high-risk patients.** *Neurology* 2007, **68**(23):2035-2038.
10. Huang HW, Guo MH, Lin RJ, Chen YL, Luo Q, Zhang Y, Wong KS: **Prevalence and risk factors of middle cerebral artery stenosis in asymptomatic residents in Rongqi County, Guangdong.** *Cerebrovascular diseases (Basel, Switzerland)* 2007, **24**(1):111-115.
11. Arenillas JF, Lopez-Cancio E, Wong KS: **Biomarkers, Natural Course and Prognosis.** *Frontiers of neurology and neuroscience* 2016, **40**:93-108.
12. Song A, Liang Y, Yan Z, Sun B, Cai C, Jiang H, Qiu C: **Highly prevalent and poorly controlled cardiovascular risk factors among Chinese elderly people living in the rural community.** *European journal of preventive cardiology* 2014, **21**(10):1267-1274.
13. Nahab F, Cotsonis G, Lynn M, Feldmann E, Chaturvedi S, Hemphill JC, Zweifler R, Johnston K, Bonovich D, Kasner S *et al*: **Prevalence and prognosis of coexistent asymptomatic intracranial stenosis.** *Stroke* 2008, **39**(3):1039-1041.
14. Ni J, Yao M, Gao S, Cui LY: **Stroke risk and prognostic factors of asymptomatic middle cerebral artery atherosclerotic stenosis.** *Journal of the neurological sciences* 2011, **301**(1-2):63-65.
15. Lou X, Ma X, Liebeskind DS, Ma N, Tian C, Lyu J, Long X, Ma L, Wang DJ: **Collateral perfusion using arterial spin labeling in symptomatic versus asymptomatic middle cerebral artery stenosis.** *Journal of cerebral blood flow and metabolism : official journal of the International Society of Cerebral Blood Flow and Metabolism* 2019, **39**(1):108-117.
16. Matsui R, Nakagawa T, Takayoshi H, Onoda K, Oguro H, Nagai A, Yamaguchi S: **A Prospective Study of Asymptomatic Intracranial Atherosclerotic Stenosis in Neurologically Normal Volunteers in a**

- 1  
2  
3 **Japanese Cohort.** *Frontiers in neurology* 2016, **7**:39.
- 4  
5 17. Meng Y, Yu K, Zhang L, Liu Y: **Cognitive Decline in Asymptomatic Middle Cerebral Artery Stenosis**  
6 **Patients with Moderate and Poor Collaterals: A 2-Year Follow-Up Study.** *Medical science monitor :*  
7 *international medical journal of experimental and clinical research* 2019, **25**:4051-4058.
- 8  
9 18. Kowal P, Chatterji S, Naidoo N, Biritwum R, Fan W, Lopez Ridaura R, Maximova T, Arokiasamy P,  
10 Phaswana-Mafuya N, Williams S *et al*: **Data resource profile: the World Health Organization Study on**  
11 **global AGEing and adult health (SAGE).** *International journal of epidemiology* 2012, **41**(6):1639-1649.
- 12  
13 19. Organization WH: **The WHO STEPwise approach to noncommunicable disease risk factor**  
14 **surveillance (STEPS).** *20 Avenue Appia, 1211 Geneva 27.*
- 15  
16 20. Feldmann E, Wilterdink JL, Kosinski A, Lynn M, Chimowitz MI, Sarafin J, Smith HH, Nichols F, Rogg J,  
17 Cloft HJ *et al*: **The Stroke Outcomes and Neuroimaging of Intracranial Atherosclerosis (SONIA) trial.**  
18 *Neurology* 2007, **68**(24):2099-2106.
- 19  
20 21. Tsivgoulis G, Sharma VK, Hoover SL, Lao AY, Ardelt AA, Malkoff MD, Alexandrov AV: **Applications and**  
21 **advantages of power motion-mode Doppler in acute posterior circulation cerebral ischemia.** *Stroke*  
22 2008, **39**(4):1197-1204.
- 23  
24 22. Zhao L, Barlinn K, Sharma VK, Tsivgoulis G, Cava LF, Vasdekis SN, Teoh HL, Triantafyllou N, Chan BP,  
25 Sharma A *et al*: **Velocity criteria for intracranial stenosis revisited: an international multicenter study**  
26 **of transcranial Doppler and digital subtraction angiography.** *Stroke* 2011, **42**(12):3429-3434.
- 27  
28 23. Mozzini C, Roscia G, Casadei A, Cominacini L: **Searching the perfect ultrasonic classification in assessing**  
29 **carotid artery stenosis: comparison and remarks upon the existing ultrasound criteria.** *Journal of*  
30 *ultrasound* 2016, **19**(2):83-90.
- 31  
32 24. Hu JB, Zhou WH, Hu SH, Huang ML, Wei N, Qi HL, Huang JW, Xu Y: **Cross-cultural difference and**  
33 **validation of the Chinese version of Montreal Cognitive Assessment in older adults residing in Eastern**  
34 **China: preliminary findings.** *Archives of gerontology and geriatrics* 2013, **56**(1):38-43.
- 35  
36 25. Brugnolo A, Morbelli S, Arnaldi D, De Carli F, Accardo J, Bossert I, Dessi B, Fama F, Ferrara M, Girtler N  
37 *et al*: **Metabolic correlates of Rey auditory verbal learning test in elderly subjects with memory**  
38 **complaints.** *Journal of Alzheimer's disease : JAD* 2014, **39**(1):103-113.
- 39  
40 26. Anderson-Hanley C, Miele AS, Dunnam M: **The fuld object-memory evaluation: development and**  
41 **validation of an alternate form.** *Applied neuropsychology Adult* 2013, **20**(1):1-6.
- 42  
43 27. Whiteside DM, Kealey T, Semla M, Luu H, Rice L, Basso MR, Roper B: **Verbal Fluency: Language or**  
44 **Executive Function Measure?** *Applied neuropsychology Adult* 2016, **23**(1):29-34.
- 45  
46 28. Misdraji EL, Gass CS: **The Trail Making Test and its neurobehavioral components.** *Journal of clinical*  
47 *and experimental neuropsychology* 2010, **32**(2):159-163.
- 48  
49 29. Giofre D, Stoppa E, Ferioli P, Pezzuti L, Cornoldi C: **Forward and backward digit span difficulties in**  
50 **children with specific learning disorder.** *Journal of clinical and experimental neuropsychology* 2016,  
51 **38**(4):478-486.
- 52  
53 30. Sands LP, Terry H, Meredith W: **Change and stability in adult intellectual functioning assessed by**  
54 **Wechsler item responses.** *Psychology and aging* 1989, **4**(1):79-87.
- 55  
56 31. Worboys M: **The Hamilton Rating Scale for Depression: The making of a "gold standard" and the**  
57 **unmaking of a chronic illness, 1960-1980.** *Chronic illness* 2013, **9**(3):202-219.
- 58  
59 32. Mlinac ME, Feng MC: **Assessment of Activities of Daily Living, Self-Care, and Independence.** *Archives*  
60 *of clinical neuropsychology : the official journal of the National Academy of Neuropsychologists* 2016,  
**31**(6):506-516.
33. Wang S, Ungvari GS, Forester BP, Chiu HFK, Wu Y, Kou C, Fu Y, Qi Y, Liu Y, Tao Y *et al*: **Gender differences**



- 1  
2  
3  
4  
5  
6  
7  
8  
9  
10  
11  
12  
13  
14  
15  
16  
17  
18  
19  
20  
21  
22  
23  
24  
25  
26  
27  
28  
29  
30  
31  
32  
33  
34  
35  
36  
37  
38  
39  
40  
41  
42  
43  
44  
45  
46  
47  
48  
49  
50  
51  
52  
53  
54  
55  
56  
57  
58  
59  
60
- in general mental health, smoking, drinking and chronic diseases in older adults in Jilin province, China. *Psychiatry research* 2017, **251**:58-62.
34. Sun Q, Wang Q, Wang X, Ji X, Sang S, Shao S, Zhao Y, Xiang Y, Xue Y, Li J *et al*: **Prevalence and cardiovascular risk factors of asymptomatic intracranial arterial stenosis: the Kongcun Town Study in Shandong, China.** *European journal of neurology* 2020, **27**(4):729-735.
35. Khalil RA: **Estrogen, vascular estrogen receptor and hormone therapy in postmenopausal vascular disease.** *Biochemical pharmacology* 2013, **86**(12):1627-1642.
36. Kassi E, Spilioti E, Nasiri-Ansari N, Adamopoulos C, Moutsatsou P, Papapanagiotou A, Siasos G, Tousoulis D, Papavassiliou AG: **Vascular Inflammation and Atherosclerosis: The Role of Estrogen Receptors.** *Current medicinal chemistry* 2015, **22**(22):2651-2665.
37. Clarkson TB: **Estrogen effects on arteries vary with stage of reproductive life and extent of subclinical atherosclerosis progression.** *Menopause (New York, NY)* 2018, **25**(11):1262-1274.
38. Westendorp IC, Grobbee DE, Witteman JC: **Oestrogen, atherosclerosis and cardiovascular disease in women: Epidemiological studies on menopause and hormone replacement therapy.** *Netherlands heart journal : monthly journal of the Netherlands Society of Cardiology and the Netherlands Heart Foundation* 2001, **9**(4-5):177-181.
39. Uehara T, Tabuchi M, Mori E: **Frequency and clinical correlates of occlusive lesions of cerebral arteries in Japanese patients without stroke. Evaluation by MR angiography.** *Cerebrovascular diseases (Basel, Switzerland)* 1998, **8**(5):267-272.
40. Arkuszewski M, Swiat M, Hurst RW, Weigele JB, Al-Okaili RN, Kasner SE, Melhem ER, Krejza J: **Vertebral and Basilar Arteries: Transcranial Color-Coded Duplex Ultrasonography versus Conventional TCD in Detection of Narrowings.** *The neuroradiology journal* 2012, **25**(5):509-514.
41. Xu WH, Li ML, Gao S, Ni J, Zhou LX, Yao M, Peng B, Feng F, Jin ZY, Cui LY: **Plaque distribution of stenotic middle cerebral artery and its clinical relevance.** *Stroke* 2011, **42**(10):2957-2959.
42. Jung SC, Kang DW, Turan TN: **Vessel and Vessel Wall Imaging.** *Frontiers of neurology and neuroscience* 2016, **40**:109-123.

**Table 1.** Characteristics of the study participants by gender

| Characteristics <sup>b</sup>                                  | Total       | Men         | Women       | P value <sup>a</sup> |
|---------------------------------------------------------------|-------------|-------------|-------------|----------------------|
| No. of participants (%)                                       | 2311 (100)  | 1076 (46.6) | 1235 (53.4) | --                   |
| Age (years), mean (SD)                                        | 57.6(10.5)  | 56.3(10.3)  | 58.8(10.5)  | <0.001               |
| Age group (years), n(%)                                       |             |             |             | <0.001               |
| 40-49                                                         | 613(26.6)   | 353(32.9)   | 260(21.1)   |                      |
| 50-59                                                         | 733(31.8)   | 334(31.1)   | 399(32.4)   |                      |
| 60-69                                                         | 607(26.3)   | 240(22.3)   | 367(29.8)   |                      |
| ≥70                                                           | 352(15.3)   | 147(13.7)   | 205(16.7)   |                      |
| Marital status <sup>b</sup> , n (%)                           |             |             |             | <0.001               |
| Married                                                       | 2058(89.1)  | 1003(93.3)  | 1055(85.4)  |                      |
| Single                                                        | 252(10.9)   | 72(6.7)     | 180(14.6)   |                      |
| Educational level <sup>b</sup> , n (%)                        |             |             |             | <0.001               |
| Illiterate                                                    | 354(15.3)   | 36(3.3)     | 318(25.8)   |                      |
| Elementary school                                             | 679(29.4)   | 247(23.0)   | 432(35.0)   |                      |
| Middle school                                                 | 976(42.3)   | 582(54.1)   | 394(31.9)   |                      |
| High school and above                                         | 301(13.0)   | 211(19.6)   | 90(7.3)     |                      |
| Body mass index (kg/m <sup>2</sup> ) <sup>b</sup> , mean (SD) | 25.2(3.8)   | 24.8(3.2)   | 25.5(4.1)   | <0.001               |
| Systolic pressure (mm Hg) <sup>b</sup> , mean (SD)            | 145.0(22.4) | 144.5(21.3) | 145.4(23.4) | 0.365                |
| Diastolic pressure (mm Hg) <sup>b</sup> , mean (SD)           | 88.3(12.7)  | 89.9(13.0)  | 86.9(12.2)  | <0.001               |
| Fasting blood glucose (mmol/l) <sup>b</sup> , mean (SD)       | 6.1(1.8)    | 6.0(1.8)    | 6.1(1.9)    | 0.084                |
| LDL-C (mmol/l) <sup>b</sup> , mean (SD)                       | 3.0(0.7)    | 2.9(0.7)    | 3.1(0.7)    | <0.001               |
| HDL-C (mmol/l) <sup>b</sup> , mean (SD)                       | 1.6(0.4)    | 1.6(0.4)    | 1.6(0.3)    | 0.031                |
| Triglycerides (mmol/l) <sup>b</sup> , mean (SD)               | 1.4(0.9)    | 1.3(0.9)    | 1.5(0.9)    | <0.001               |
| Total cholesterol (mmol/l) <sup>b</sup> , mean (SD)           | 5.4(1.0)    | 5.2(0.9)    | 5.5(1.0)    | <0.001               |
| Dyslipidemia <sup>b</sup> , n (%)                             | 922(41.7)   | 378(36.2)   | 544(46.7)   | <0.001               |
| Smoking <sup>b</sup> , n (%)                                  | 504(21.9)   | 489(45.6)   | 15(1.2)     | <0.001               |
| Alcohol consumption <sup>b</sup> , n (%)                      | 727(31.5)   | 672(62.5)   | 55(4.5)     | <0.001               |
| Obesity <sup>b</sup> , n (%)                                  | 437(19.2)   | 165(15.5)   | 272(22.5)   | <0.001               |
| Hypertension <sup>b</sup> , n (%)                             | 1294(56.6)  | 592(55.3)   | 702(57.8)   | 0.220                |

|                                       |           |           |           |       |
|---------------------------------------|-----------|-----------|-----------|-------|
| Diabetes <sup>b</sup> , n (%)         | 725(32.9) | 319(30.5) | 406(34.9) | 0.028 |
| Carotid stenosis <sup>b</sup> , n (%) | 59(2.9)   | 33(3.4)   | 26(2.5)   | 0.202 |
| aICAS <sup>b</sup> , n (%)            | 154(7.6)  | 62(6.4)   | 92(8.6)   | 0.055 |
| MMSE score <sup>c</sup> , mean (SD)   | 23.4(5.4) | 24.7(4.4) | 22.5(5.9) | 0.001 |
| MoCA score <sup>c</sup> , mean (SD)   | 17.9(5.3) | 18.6(4.8) | 17.5(5.6) | 0.088 |

HDL-C: high-density lipoprotein cholesterol; LDL-C: low-density lipoprotein cholesterol; aICAS: asymptomatic intracranial artery stenosis; MMSE: Mini-Mental State Examination; MoCA: Montreal Cognitive Assessment.

<sup>a</sup>P values are for the test of differences between male and female.

<sup>b</sup>The number of participants with missing value were one for marital status and educational level, 38 for body mass index and obese status, 29 for blood pressure, 175 for fasting blood glucose, 106 for lipid measurements (LDL-C, HDL-C, triglycerides, and total cholesterol), eight for smoking, two for alcohol consumption, 102 for dyslipidemia, 26 for hypertension, 104 for diabetes, 284 for carotid stenosis, and 284 for aICAS (of the 2311 participants, 2027 completed the diagnostic procedure for aICAS).

<sup>c</sup>MMSE and MoCA tests were performed in a subsample of 308 participants, including 154 with aICAS and 153 age- and sex-matched controls.

**Table 2.** Arterial distribution of asymptomatic intracranial atherosclerotic stenosis (aICAS) according to severity of stenosis (Total number of arteries with aICAS = 305)

| Arteries | Severity of intracranial arterial stenosis, n (%) |          |          |           |          |
|----------|---------------------------------------------------|----------|----------|-----------|----------|
|          | Mild                                              | Moderate | Severe   | Occlusion | Total    |
| ICA      | 28 (9.2)                                          | 20 (6.6) | 17 (5.6) | 6 (2.0)   | 71(23.3) |
| MCA      | 45 (14.8)                                         | 21 (6.9) | 23 (7.6) | 6 (2.0)   | 95(31.2) |
| ACA      | 22 (7.2)                                          | 17 (5.6) | 16 (5.3) | 0 (0.0)   | 55(18.0) |
| PCA      | 10 (3.3)                                          | 9 (3.0)  | 18 (5.9) | 1 (0.3)   | 38(12.5) |
| VA       | 4 (1.3)                                           | 2 (0.7)  | 8 (2.6)  | 11 (3.3)  | 25(8.2)  |
| BA       | 13 (4.3)                                          | 3 (1.0)  | 5 (1.6)  | 0 (0.0)   | 21(6.9)  |

MCA, middle cerebral artery; ACA, anterior cerebral artery; ICA, intracranial internal carotid artery; PCA, posterior cerebral artery; VA, vertebral artery; BA, basilar artery.

1  
2  
3  
4 **Figure Legends**  
5

6 **Figure 1** Flowchart of the study participants  
7

8  
9 **Figure 2** Age- and gender-specific prevalence (per 100 population) of cardiovascular risk  
10  
11 factors  
12

13  
14 **Figure 3** Age- and gender-specific prevalence (per 100 population) of aICAS  
15  
16  
17  
18  
19  
20  
21  
22  
23  
24  
25  
26  
27  
28  
29  
30  
31  
32  
33  
34  
35  
36  
37  
38  
39  
40  
41  
42  
43  
44  
45  
46  
47  
48  
49  
50  
51  
52  
53  
54  
55  
56  
57  
58  
59  
60

For peer review only

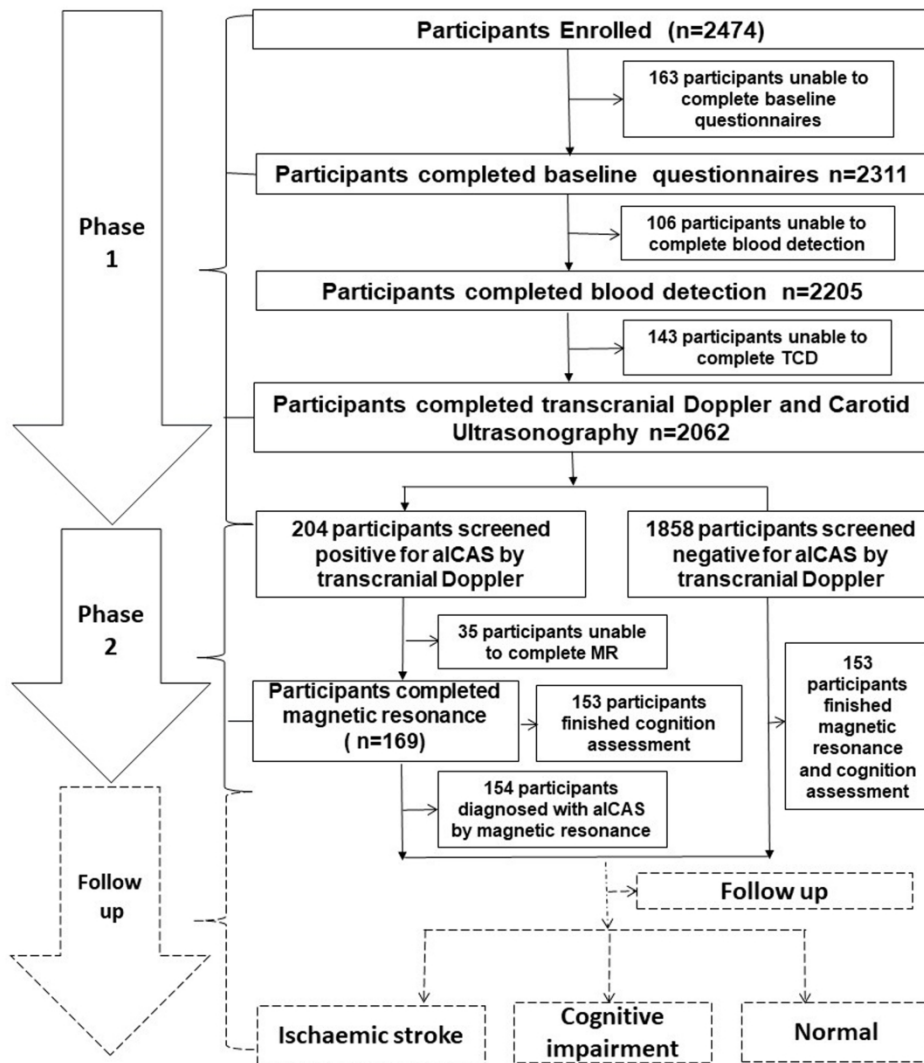

Figure 1 Flowchart of the study participants

236x263mm (300 x 300 DPI)

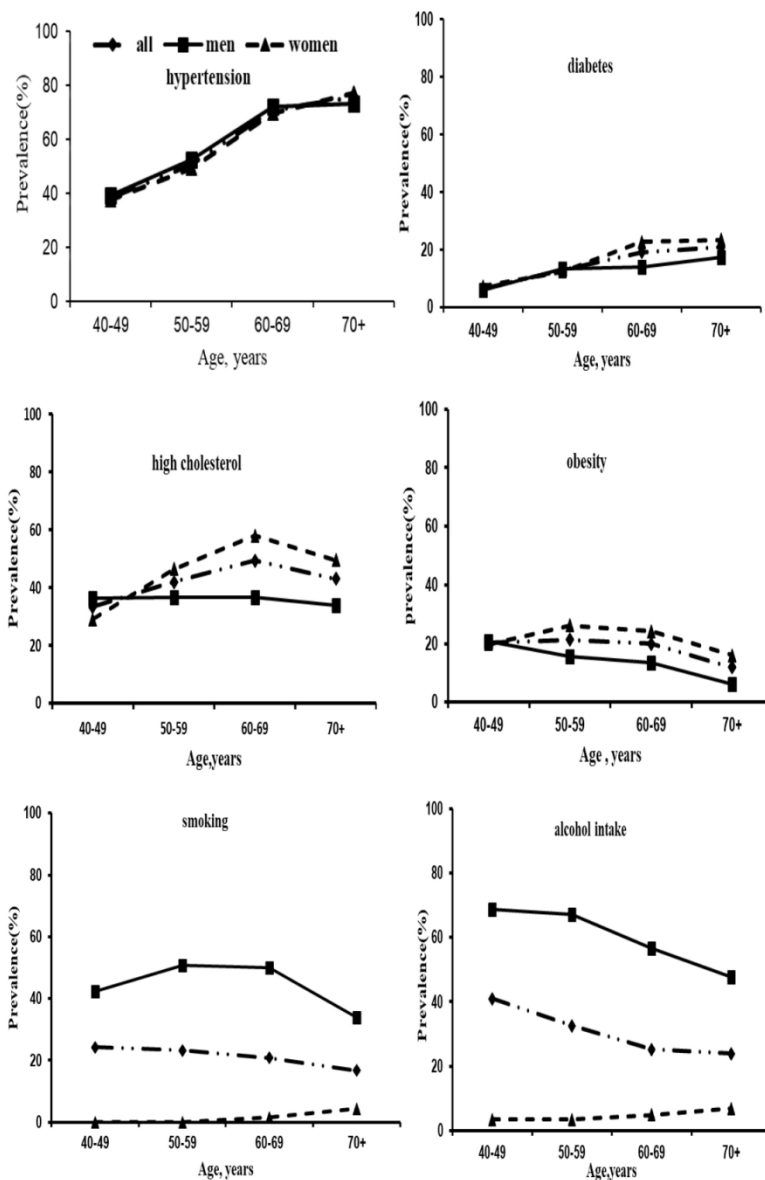

Figure 2 Age- and gender-specific prevalence (per 100 population) of cardiovascular risk factors

101x145mm (300 x 300 DPI)

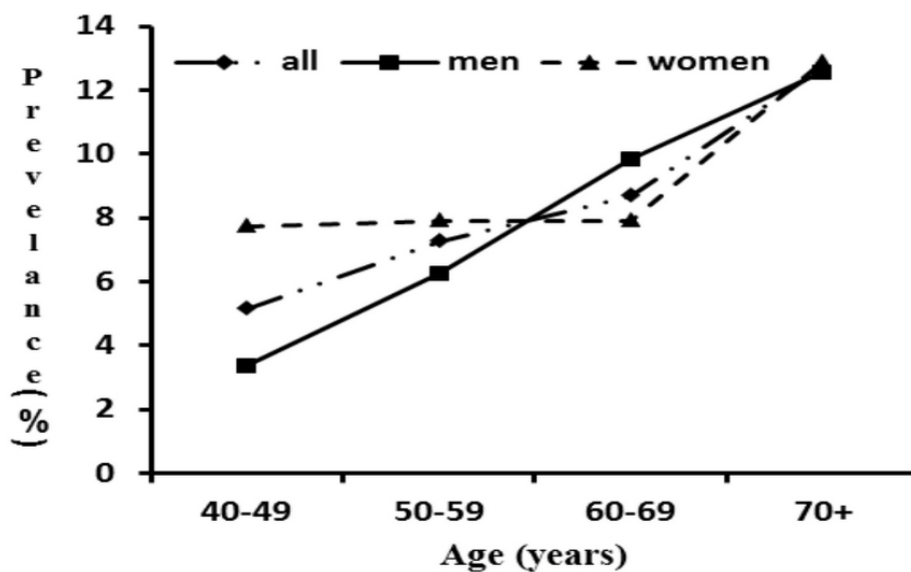

all: P for trend<0.001; Men: P for trend<0.001; Women: P for trend =0.140

Figure 3 Age- and gender-specific prevalence (per 100 population) of aICAS

78x56mm (300 x 300 DPI)
